1 **Oscillations without cortex: Working memory**  
2 **modulates brainwaves in the endbrain of crows**

3

4 **Lukas Alexander Hahn<sup>1\*</sup>, Dmitry Balakhonov<sup>1</sup>, Mikael Lundqvist<sup>2</sup>, Andreas Nieder<sup>3</sup> &**  
5 **Jonas Rose<sup>1,4,\*</sup>**

6

7 *<sup>1</sup>Neural Basis of Learning, Institute of Cognitive Neuroscience, Faculty of Psychology, Ruhr University*  
8 *Bochum, 44801 Bochum, Germany*

9 *<sup>2</sup>Department of clinical neuroscience, Psychology, Karolinska Institute, Solna, Sweden*

10 *<sup>3</sup>Animal Physiology, Institute of Neurobiology, University of Tübingen, 72076 Tübingen, Germany*

11 *<sup>4</sup>Lead contact*

12 *\*Correspondence: [lukas.hahn@ruhr-uni-bochum.de](mailto:lukas.hahn@ruhr-uni-bochum.de) (L.A.H), [jonas.rose@ruhr-uni-bochum.de](mailto:jonas.rose@ruhr-uni-bochum.de) (J.R.)*

13

## 14 **Relevance statement**

15 Contemporary models of higher cognition, like those of working memory, often include temporal  
16 dynamics of neural activity such as gamma oscillations. Birds and mammals convergently evolved  
17 these cognitive functions and here we show that, despite the large evolutionary distance and  
18 largely different brain organization, crows share many of the oscillatory fingerprints reported in  
19 primates. This indicates that neural networks required for such LFP phenomena have evolved in  
20 parallel and may be critical to higher cognition.

## 21 **Summary**

22 Complex cognition requires coordinated neuronal activity at the network level. In mammals, this  
23 coordination results in distinct dynamics of local field potentials (LFP) that have been central in  
24 many models of higher cognition. Because these models are based on mammalian data, they  
25 often implicitly assume a cortical organization. Higher associative regions of the brains of birds  
26 do not have cortical layering, yet these regions have neuronal single-cell correlates of higher  
27 cognition that are very similar to those found in mammals. Here we recorded LFP in the avian  
28 equivalent of prefrontal cortex while crows performed a highly controlled and cognitively  
29 demanding working memory task, adapted from monkeys. To further ensure that recordings  
30 reflected only cognitive processes detached from motor-related activities we trained and  
31 monitored the animals to keep their head still. We found signatures in local field potentials,  
32 modulated by working memory. Frequencies of a narrow gamma (30-59 Hz) and the beta band  
33 (13-19 Hz) contained information about the location of the target items on the screen and were  
34 modulated by working memory load. This indicates a critical involvement of these bands in  
35 ongoing cognitive processing. We also observed bursts in the beta and gamma frequencies,  
36 similar to those observed in monkeys. Such bursts are a vital part of 'activity silent' models of  
37 working memory. Thus, despite the lack of a cortical organization the avian associative pallium  
38 can create LFP signatures reminiscent of those observed in primates. This points towards a  
39 critical cognitive function of oscillatory dynamics evolved through convergence in species capable  
40 of complex cognition.

41

## 42 Introduction

43 To perform the computations underlying complex cognition, the neuronal ensembles of our brains  
44 must be coordinated, otherwise, the chatter of a billion neurons may produce only noise (Lisman,  
45 1997; Miller et al., 2018; Naud & Sprekeler, 2018). Notably, the spiking of individual neurons  
46 follows a tight temporal organization that results in regular patterns of excitation and inhibition. At  
47 the network level, these patterns of activity can be observed in fluctuations of electrical local field  
48 potentials (LFP) that oscillate at different frequencies (Buzsáki et al., 2012, 2013; Buzsáki &  
49 Wang, 2012). These frequencies are commonly clustered into bands, for example, the gamma  
50 band of frequencies above 30 Hz. Gamma oscillations are likely generated in the superficial layers  
51 of cortex (Bastos et al., 2018; Buffalo et al., 2011; Maier et al., 2010), from perisomatic currents  
52 around the similarly oriented pyramidal cell layer and they arise from feedback inhibition between  
53 pyramidal cells and somatic targeting parvalbumin-positive inhibitory neurons (Buzsáki et al.,  
54 2012; Buzsáki & Wang, 2012; Cardin et al., 2009; Carlén et al., 2012; Traub et al., 1996).  
55 Functionally, the gamma band has been suggested to be relevant for inter-regional  
56 communication of neuronal populations (Fries, 2015), and to play a key role in executive control  
57 (Miller et al., 2018). Thus, understanding these coordinated computations is the key to unlocking  
58 a functional model of higher cognition.

59 A cornerstone of complex cognition is working memory (WM), which enables an animal to actively  
60 retain and manipulate a limited amount of information to guide behavior (Baddeley et al., 2021).  
61 WM is also particularly well suited to investigate higher cognition from a comparative perspective.  
62 It was described almost simultaneously in humans and pigeons (Baddeley & Hitch, 1974; Honig,  
63 1978). Furthermore, birds and mammals show similar WM performance (Balakhonov & Rose,  
64 2017; Gibson et al., 2011). For example, the capacity of WM, the number of individual items that  
65 can be maintained simultaneously, is comparable between crows and macaque monkeys  
66 (Balakhonov & Rose, 2017). Even single neuron correlates of WM in birds are virtually identical  
67 to those in mammals (Ditz & Nieder, 2016, 2020; Moll & Nieder, 2015; Rinnert et al., 2019; Rose  
68 & Colombo, 2005) and we recently found that this also extends to the neurophysiological limits of  
69 WM capacity (Buschman et al., 2011; Hahn et al., 2021).

70 Given the large evolutionary distance between the species, these similarities are likely the result  
71 of convergent evolution (Emery & Clayton, 2004; Güntürkün & Bugnyar, 2016) and they are  
72 sharply contrasted by prominent anatomical differences. Most notably, birds lack the mammalian  
73 separation between grey and white matter along with the highly structured organization of the  
74 neocortex (Güntürkün & Bugnyar, 2016; Harris & Shepherd, 2015). While recent data suggest a  
75 cortex-like circuitry in sensory regions of the avian pallium, a layered neocortex-like structure is

76 absent in associative avian brain regions that are crucial to WM function (Stacho et al., 2020).  
77 This includes the avian equivalent of PFC, the nidopallium caudolaterale (NCL), which shares  
78 many defining properties of the PFC, including the dense dopaminergic innervation, multimodal  
79 sensory afferents, premotor projections, and neuronal correlates for WM (Güntürkün & Bugnyar,  
80 2016; Herold et al., 2011; Kröner & Güntürkün, 1999; Nieder, 2017; Waldmann & Güntürkün,  
81 1993).

82 Modern models of WM are heavily influenced by the observation of temporal dynamics in the  
83 mammalian PFC. In particular, gamma oscillations are closely associated with WM-related  
84 processes (Howard et al., 2003; Kornblith et al., 2016; Lundqvist et al., 2016; Roux et al., 2012;  
85 Tallon-Baudry et al., 1998). The highly structured organization of the layered mammalian  
86 neocortex is an ideal substrate to generate and investigate such oscillations (Einevoll et al., 2013).  
87 Consequently, models of temporal dynamics are almost exclusively built on mammalian data.  
88 However, whether these cognitive oscillations *require* the specific layered organization of the  
89 cortex is unclear. It has even been argued that oscillations could be an epiphenomenon of the  
90 underlying network architecture rather than a functional process in itself (Merker, 2013; Ray &  
91 Maunsell, 2015). Therefore, the investigation of LFP in avian associative brain regions, lacking  
92 the layered organization of the cortex, offers a unique comparative perspective.

93 To date, only relatively few studies have investigated modulations of LFP in birds. Most  
94 prominently the optic tectum and neighboring tegmental nuclei show modulation in the gamma  
95 range during attention (Goddard et al., 2012; Neuenschwander & Varela, 1993; Sridharan et al.,  
96 2011; Sridharan & Knudsen, 2015). Gamma band modulations were further reported in the avian  
97 forebrain during birdsong (Brown et al., 2021; Lewandowski & Schmidt, 2011; Spool et al., 2021),  
98 and in the avian hippocampal formation *in vitro* (Dheerendra et al., 2018) and during sleep (van  
99 der Meij et al., 2020). However, these observations cannot answer the question of whether  
100 oscillations underlie higher cognition since they were either made in the neatly layered optic  
101 tectum, were tightly linked to motor behavior, or occurred in sleeping birds.

102 Thus, descriptions of oscillatory dynamics in the non-layered endbrain of birds that are tied to  
103 abstract cognition such as WM are still lacking. Hence, it remains unknown if the single-cell  
104 similarities extend to oscillatory population dynamics that underlie higher cognition in mammals,  
105 or if birds have such cognition without oscillations. If they existed and played comparable roles in  
106 avian and mammalian WM, it would be valuable evidence towards general, cross-species  
107 mechanisms supporting higher-order cognition.

108

## 109 **Results**

110 To investigate LFP dynamics in the avian brain during a complex form of cognition, we trained  
111 crows on a multi-item working memory task, previously used for probing WM capacity in crows  
112 and primates (Balakhonov & Rose, 2017; Buschman et al., 2011). On each trial, the crows were  
113 presented with a variable number of colored squares that they had to retain over a memory delay.  
114 Subsequently, the colors reappeared and the birds indicated with a single peck which of the  
115 squares now had a different color (Fig. 1A). The performance of the crows was load-dependent,  
116 gradually declining with higher loads. Median performances for item loads (ipsilateral to change)  
117 of one, two, and three were 95.88 %, 78.31 %, and 58.21 %, respectively. This result is very  
118 similar to the performance reported in monkeys in the same task (Buschman et al., 2011), and  
119 has been discussed in detail in a previous study (Balakhonov & Rose, 2017).

### 120 **LFP in the endbrain of crows is task modulated**

121 To investigate if WM modulates oscillations in a comparable way in crows as in primates, we  
122 analyzed LFP recorded throughout NCL from a total of 336 electrodes. We performed spectral  
123 decomposition of the recorded signal using Morlet-wavelet convolution, after removing neuronal  
124 spiking artifacts and 50 Hz line noise (see Methods for details). LFP power was affected  
125 throughout the time course of a trial in a frequency-dependent manner. To facilitate the  
126 comparison to results obtained in primates we subdivided frequencies into the commonly  
127 recognized LFP bands, i.e., ‘theta’, ‘alpha’, ‘beta’, and ‘gamma’ (Miller et al., 2018).

128 We observed modulation of LFP power in a narrow gamma frequency band (40-52 Hz) during the  
129 sample phase and delay phase, as well as high levels of power in a 3-8 Hz frequency band toward  
130 the end of the sample phase (Fig. 1B and C). This was also observed in the raw signal trace,  
131 most prominently in the sample and towards the end of the delay, when the individual frequency  
132 components contributed most to the composite signal (indicated by higher frequency amplitudes  
133 in Fig. 1D).

134 Were specific frequency bands consistently affected by the ongoing cognitive task? We tested  
135 trial averaged LFP power during the trial against stable baseline power (see Methods for details).  
136 The observations, made at the single-trial level, were consistent across trials (Fig. 2, example  
137 electrode). Power in the low band was significantly suppressed during the early sample, and at  
138 the end of the delay (Fig. 2, bottom). The high-frequency band (gamma) was significantly elevated  
139 relative to baseline during the late sample and towards the end of the delay phase (Fig. 2, top;  
140 see SFig. 1 for statistical results and further details).

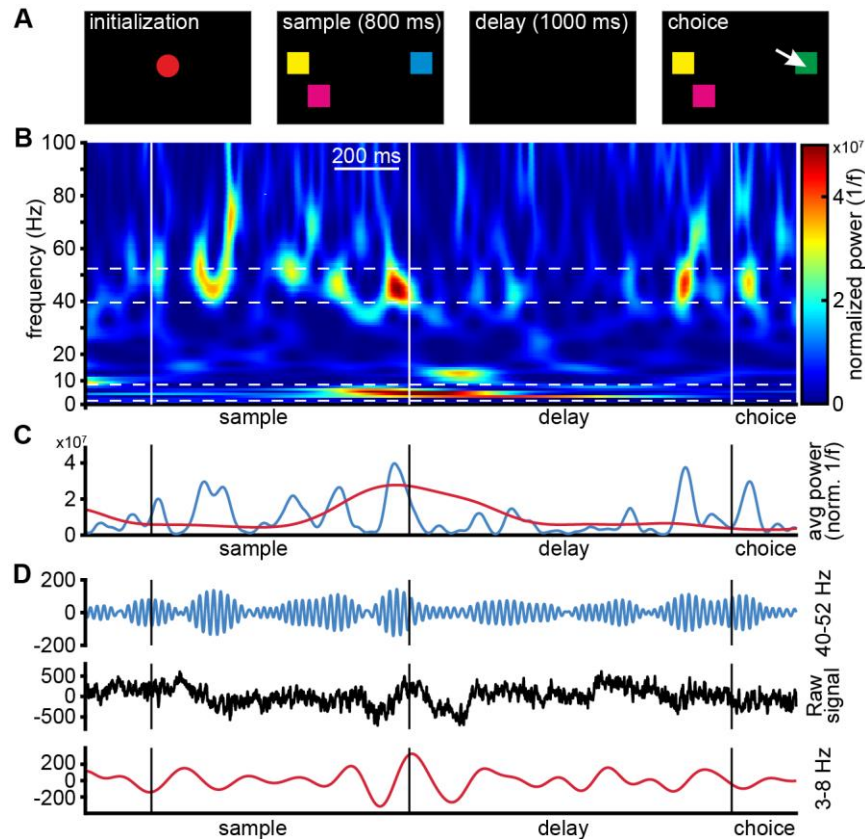

141

**Figure 1:** (A) Behavioral protocol. After the bird initiated a trial by acquiring and holding head fixation, the sample stimuli (2-5 colored squares distributed so that 0-3 colored squares appeared on each half of the screen) were presented. Birds retained head fixation and maintained color information over a memory delay, until the choice stimuli were presented (identical in color and location to those of the sample phase, except for one square that had changed color). Birds then indicated the square that changed color between sample and choice by pecking on it. (B) Single-trial example of time-frequency power of LFP. Power was elevated during the transition from sample to delay phase in a band between 3 and 8 Hz. Higher frequencies between 40 and 52 Hz showed recurring increases of power in short bursts during the sample and the delay period, notably also towards the end of the delay. (C) Mean power of the selected bands across time (3-8 Hz, red, and 40–52 Hz, blue). The visible peaks correspond to the warmer colors in panel B. (D) Raw unfiltered LFP signal (black), and the same signal, band-pass filtered in the range of higher frequencies (blue), and of the lower range frequencies (red). The respective frequency components of the raw signal become visible as their amplitude increased and decreased over time.

142 This shows that modulations of LFP were generated in NCL in narrow and well-defined frequency  
143 bands. These modulations reflected processing in the different task phases, and were not motor-  
144 related, as the birds had to retain a stable head up until the choice. Because the gamma frequency  
145 range was most affected by our task, we focused on electrodes that showed modulations in that  
146 range. We examined the overall modulations of recorded LFP power from all electrodes with  
147 significant gamma modulation (see Supplementary section 2 for more details).

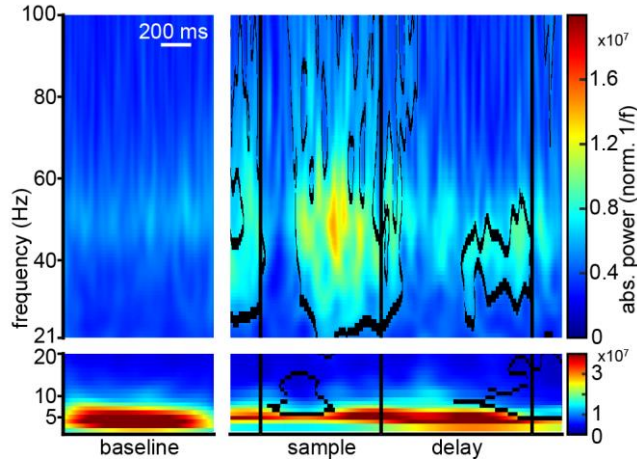

**Figure 2:** Average time-frequency power of LFP of a single electrode of a single session during the baseline period (1 second during the middle of the inter-trial-interval) and during middle of the trial period. The duration of the pre-sample period was variable dependent on behavior, it could therefore not be used as baseline, and it contains motion and stimulus-viewing. In the sample phase an increase in gamma power, and a decrease in alpha/beta power is detectable. Outlined areas indicate power values significantly different from baseline. Higher and lower frequencies were split to highlight their respective power range that scales with  $\frac{1}{f}$ .

148  
149  
150

151 The sampled average signal showed that the task phases strongly affected the LFP. Both low  
152 gamma frequencies (33-48 Hz 'low gamma') and beta band frequencies (13-19 Hz 'beta') showed  
153 a distinct modulation by the task. The low gamma band was shortly suppressed after the sample  
154 onset, followed by an increase in power towards the end of the sample phase (Fig. 3A top). In the  
155 memory delay phase power of these frequencies remained at an elevated level (relative to  
156 baseline), and ramped up towards the end of the delay leading up to the choice. Beta frequencies  
157 initially showed strong suppression of power during the early sample phase (Fig. 3A bottom) and  
158 returned to baseline levels toward the late sample and early delay. Power was again suppressed  
159 towards the end of the delay phase, leading up to the choice.

### 160 **Gamma modulation reflected working memory processing**

161 The described modulations in power have so far been linked to the processing of the WM task,  
162 divided into the processing of presented memory items (during sample), their maintenance (during  
163 the delay), and in anticipation of the upcoming change detection (towards the end of the delay).  
164 We investigated if our WM task caused further modulation of LFP that reflected cognitive  
165 processing of relevant stimulus dimensions, by analyzing if power of these bands contained  
166 information about the location of the presented items and if the number of items affected power.

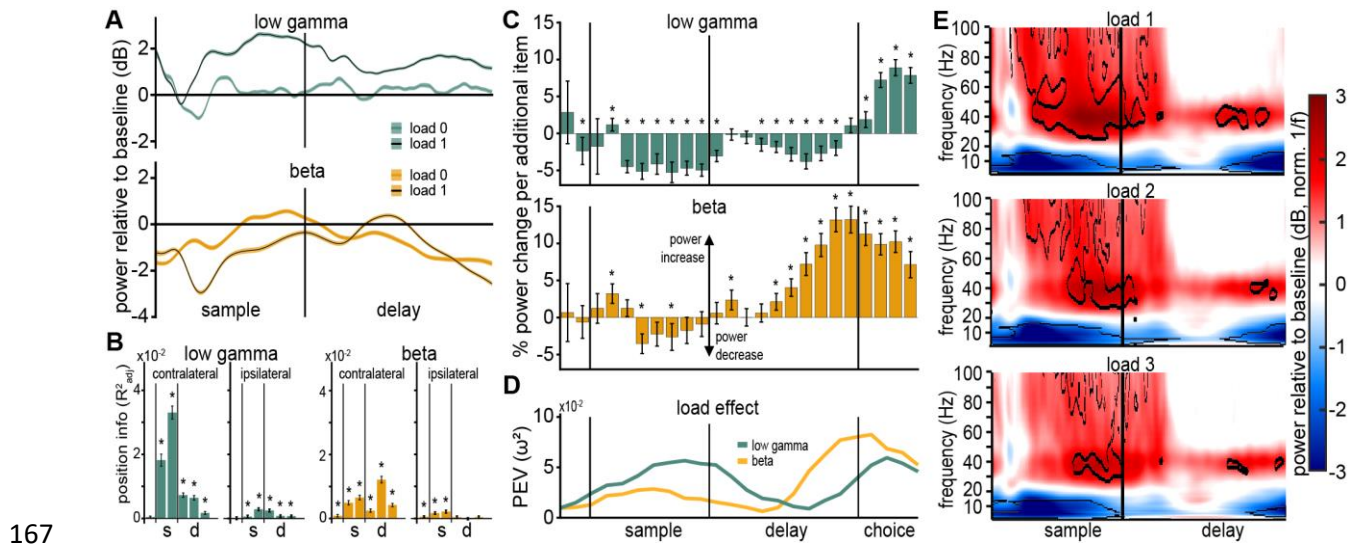

167

**Figure 3:** (A) LFP in the gamma (top) and beta (bottom) are modulated by working memory. At load 0 no stimuli were presented contralateral to the electrode, at load 1 a single contralateral stimulus was presented during the sample period. (B) Position information ( $\Delta R_{adj}^2$ ) contained in average power of the low gamma and beta band (400 ms bins). Power of the low gamma and of the beta frequency band contained information about the contralateral positions of stimuli, in contrast information about the positions of the ipsilateral stimuli was much smaller. Position information for low gamma frequencies was more pronounced during the sample phase than during the delay phase. Stars indicate significance at the Bonferoni corrected alpha level ( $\alpha = 0.0083$ ; refer to SFig. 3 for other frequency bands). (C) Average change in power per added item (100 ms bins). The low gamma frequency band (32-47 Hz) shows a reduction of power with every added item throughout the sample delay phase, but gains power with every added item in the choice phase. The beta frequency band (12-29 Hz) shows a consistent increase in power with every added item throughout sample and delay phase, notably peaking towards the end of the delay. (D) Quantification of the load effect depicted in (A), as percent explained variance by factor power ( $\omega^2$ ). (E) WM load affected the time-frequency power of LFP. Average power of all electrodes with significant gamma band modulation, relative to baseline (in decibel), for load 1-3. Lower frequencies show a general suppression of power, relative to baseline, while higher frequencies show a general increase in power. The tree panels depict different WM-load (number of items contralateral to the recording electrode). Outlined areas indicate significant differences from baseline.

168 To estimate information about ipsilateral and contralateral positions, we applied the method of  
 169 (Kornblith et al., 2016), performing model comparisons of generalized linear models (see Methods  
 170 for details). For all electrodes that had significant gamma modulation (see Supplementary section  
 171 2), we derived position information, needed to solve the task, for the ipsilateral and contralateral  
 172 locations by quantifying the difference of model fits ( $\Delta R_{adj}^2$ ), in six 400 ms intervals (pre-sample;  
 173 early/late sample; early/mid/ late delay).

174 In general, power contained information about the (task relevant) locations of presented squares  
 175 (Fig. 3B). This information was most prominently present during the sample phase. We found that  
 176 low gamma power had significant position information during the sample for the contralateral side



177 of the screen (early and late sample, mean ( $\pm$  SEM): 0.0182 ( $\pm$  0.0019),  $F(1,1247) = 379.83$ ,  $p <$   
178 0.0001,  $\omega^2 = 0.2327$  and 0.0330 ( $\pm$  0.0020),  $F(1,1247) = 1063.8$ ,  $p < 0.0001$ ,  $\omega^2 = 0.4597$ ,  
179 respectively). Beta band power contained a significant amount of information during the sample  
180 (early and late sample, mean ( $\pm$  SEM): 0.0049 ( $\pm$  0.0007),  $F(1,1247) = 200.02$ ,  $p < 0.0001$ ,  $\omega^2 =$   
181 0.1374 and 0.0065 ( $\pm$  0.0008),  $F(1,1247) = 299.36$ ,  $p < 0.0001$ ,  $\omega^2 = 0.1928$ , respectively), and  
182 notable information during the delay (mid delay, mean ( $\pm$  SEM), 0.0121 ( $\pm$  0.0011),  $F(1,1247) =$   
183 543.44,  $p < 0.0001$ ,  $\omega^2 = 0.2993$ ).

184 Other frequency bands (3-7 Hz 'theta', 8-12 Hz 'alpha', and 83-98 Hz 'high gamma') also contained  
185 information about the contralateral position during the sample phase and delay phases (SFig. 2).  
186 However, these frequency bands had much less information compared to the low gamma band  
187 (see Supplementary section 3). None of the frequency bands had meaningful information about  
188 the ipsilateral locations (refer to the extended data table 1 & 2 for a detailed overview). This  
189 location information contained in LFP power indicates involvement in processing the spatial  
190 component of the task, as binding each color to a location was necessary for localizing the change  
191 detection.

## 192 **Working memory load modulated gamma**

193 The major manipulation affecting cognitive processing in our task was the number of squares the  
194 birds had to memorize as it determined the load of WM. We considered three load conditions  
195 ('loads'). Because power contained information only for contralateral locations, we analyzed load  
196 effects for the number of squares presented in the visual hemifield contralateral to the recording  
197 electrode. Trials in which only one square was presented during the sample (Fig. 1A), were  
198 considered to have 'load 1' (irrespective of the number of squares on the other side of the screen).  
199 Following this logic, trials with two, or three presented colors were considered 'load 2', and 'load  
200 3', respectively. To understand how LFP-power was modulated by WM-load, we again compared  
201 the power of all gamma-modulated electrodes during the sample and memory delay phases to  
202 baseline power during the inter-trial interval. When comparing power across the different loads,  
203 the local maximum of power in the low gamma band appeared to be modulated, with higher loads  
204 reducing average power (Fig. 3E, SFig. 3). Similarly, the power in the lower bands appeared to  
205 be affected by load. To better quantify the load effect, we tested its effect on power in the five  
206 major frequency bands introduced above (we focus on the low gamma and the beta band that  
207 prominently affected by the overall task, refer to SFig. 4 for the other frequency bands). The mean  
208 power in the respective frequency band, across all channels with significant gamma power  
209 modulation in load 1 trials, was compared by calculating the average change in power per added

210 item. Power in the low gamma band decreased as load increased during sample and delay but  
211 reversed this modulation during the subsequent choice phase (Fig. 3C). The beta band showed  
212 the opposite effect of load, with power generally increasing at higher loads. We further quantified  
213 the magnitude of the load effect by calculating the effect size (PEV,  $\omega^2$ ) of the LFP differences for  
214 different loads over time (see methods for details). The influence of load on low-gamma power  
215 was largest towards the end of the sample (power decreased with load), and in the choice phase  
216 (power increased with load). The strongest beta power load modulation started appearing during  
217 the middle of the delay phase (power increased with load), peaking at the end of the delay (Fig.  
218 3D, refer to table 3 for numerical values). This means that LFP power was substantially affected  
219 by both the locations of the presented stimuli and by the WM load. Therefore, LFP processes  
220 seem to be tightly linked to ongoing cognitive processing of the WM task, during both sample  
221 encoding of memory items, and their subsequent maintenance during the delay.

## 222 **Beta and Gamma appear in bursts**

223 An additional observation we made was that power modulations in the low gamma band appeared  
224 as bursts throughout sample and delay phase (Fig. 1B). In a study in which monkeys performed  
225 a sequential version of our task (Lundqvist et al., 2016), increases in gamma power were found  
226 to originate from sparse and temporarily defined 'bursts' of power. We tested if the increase in  
227 gamma power was due to individual bursts by investigating the potential burst events (power  
228 crossing a threshold of  $\text{mean} + 1.5 \times \text{SD}$  for two cycles). We calculated burst rates over time (i.e.,  
229 the observed rate of bursts at any given time in a trial, see methods for details). Burst rate in the  
230 low gamma band increased throughout the sample phase, peaking in the late sample phase (load  
231 1,  $\text{mean} \pm \text{SEM}$ ,  $0.0834 \pm 0.0008$  at 620 ms), before gradually reducing throughout the delay (Fig.  
232 4A top, table 4, SFig. 4 for alpha and high gamma). Notably, the burst rate increased again during  
233 the latest part of the delay. These burst rates were also load-dependent in two directions  
234 depending on the task phase. During the sample phase, the burst rate significantly decreased  
235 with load, while during the late delay phase the burst rate increased with load (Fig. 4A, refer to  
236 table 5 for statistical values). The beta band also showed this effect (refer to Supplementary  
237 section 4 for the other frequency bands and for a comparison of bursts to population spiking rate).  
238 The phase and load-dependent rates of low gamma and beta bursts correlated with processing  
239 demands of WM for encoding during the sample, maintenance during the delay, and preparation  
240 for decoding towards the end of the delay and choice phase.

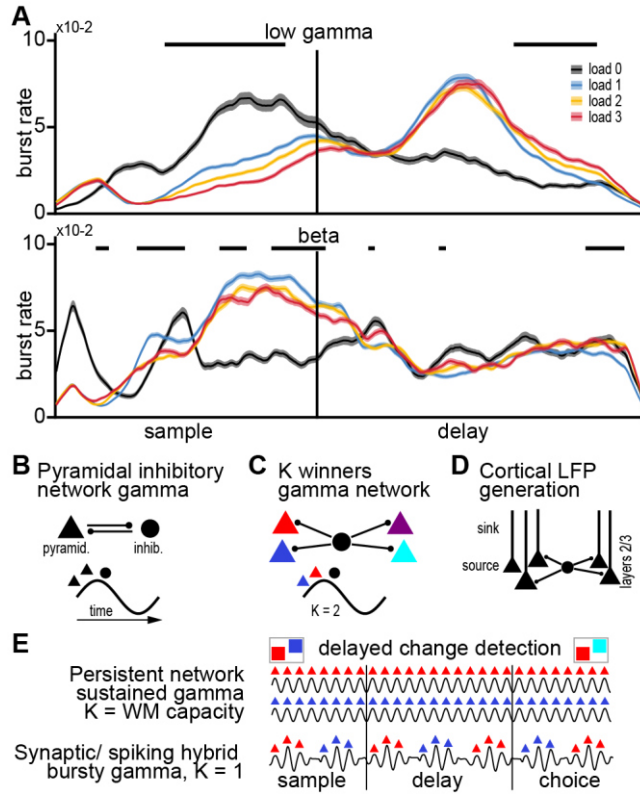

241

Figure 4: **(A)** Trial burst rate of low gamma and beta frequency bands during the trial at gamma modulated sites. Burst rate of low gamma strongly increases towards the end of the sample phase, while beta has peak burst rate in the middle of the delay. Load modulation occurs with higher loads decreasing burst rate in the sample but increasing burst rate towards the end of the delay. Black bars indicate consecutive significance between loads 1-3 ( $p < 0.05$ ) over 2 cycles of the bands center frequency **(B)** Schematic generation of mammalian pyramidal inhibitory network gamma (PING). Gamma oscillation is generated in a cycle when excitatory pyramidal cells first become active, exciting inhibitory parvalbumin positive interneurons that provide dense, short-lasting feedback inhibition. The inhibition briefly shuts down the pyramidal cells to terminate the cycle. **(C)** Implementation of a winner-take-all dynamic. If several pyramidal populations (colored triangles) are connected to the same inhibitory population (black circle), the gamma generating feedback inhibition can implement a K winners take all dynamic where only the K most excited populations will spike before the feedback inhibition deactivates all populations. For example, the earlier spiking of blue and red in each cycle results in  $K = 2$ . **(D)** Cortical layer organization facilitate gamma oscillation. Many similarly aligned pyramidal cells receive rhythmic, peri-somatic inhibition. The pyramidal cells are thought to act as aligned dipoles with the source close to the somas and the sink in the apical dendrites, creating an extracellular field. The gamma in cortical LFPs is thus generated in the superficial layers of cortex. Crow NCL lacks this layered anatomical organization. **(E)** Two different networks solving a 2-item delay change detection task. The two colored squares can be retained either by selective, persistent activity (top) in a network where gamma implements a  $K = \text{WM capacity}$  winner take all algorithm, or alternatively, in a network relying both on intermittent spiking and synaptic mechanisms with  $K = 1$ . In the latter, since  $K = 1$ , the two memory representations take turn being active and silent resulting in bursting gamma. In the silent periods, information is retained in synaptic changes rather than sustained spiking.

## 242 **Discussion**

243 We observed cognitively modulated oscillations of LFP in the NCL of carrion crows performing a  
244 WM task. Oscillations occurred in a narrow gamma band, and in the beta band. This data shares  
245 many similarities with those observed in monkey PFC. While these results are consistent with  
246 behavioral and single-cell observations they are remarkable given that WM of birds and monkeys  
247 have diverging neuronal architectures that evolved independently over the last 320 million years  
248 (Benton & Donoghue, 2007).

### 249 **Cognitively modulated non-cortical gamma**

250 The laminar and columnar organization of the mammalian cortex, with similarly aligned pyramidal  
251 cells, is thought to produce extracellular electrical fields that facilitate the observation of rhythmic  
252 population activity (Fig. 4B; (Buzsáki et al., 2012; Einevoll et al., 2013)). However, the associative  
253 pallium of birds lacks this structure entirely (Güntürkün & Bugnyar, 2016), and the mosaic-like  
254 arrangement of fiber patches in NCL (Stacho et al., 2020) differs substantially from the highly  
255 structured, layered, organization of the PFC. Gamma oscillations in birds have first been reported  
256 in the optic tectum of pigeons (Neuenschwander & Varela, 1993) and barn owls (Sridharan et al.,  
257 2011), a midbrain structure that like the mammalian neocortex displays a separation between  
258 grey and white matter and organization into highly structured layers (Güntürkün et al., 2020). Only  
259 recently modulated gamma was reported in the (non-layered) telencephalon of birds. In the song  
260 system of singing zebra finches (Brown et al., 2021; Lewandowski & Schmidt, 2011), and in the  
261 hippocampus of sleeping zebra finches (van der Meij et al., 2020). Functionally involved in such  
262 gamma oscillations are excitatory cell types, homologous to mammalian excitatory neurons,  
263 which are part of neuronal circuitry that can be optogenetically induced to produce broad range  
264 gamma oscillations (Spool et al., 2021), Fig. 4B). These neurons were found in the zebra finch  
265 pallium, adjacent to NCL (Spool et al., 2021). Based on the similarities of the observations of  
266 gamma in the avian optic tectum it has been suggested that gamma rhythms play an essential  
267 role in information processing and are thus evolutionary conserved (Sridharan & Knudsen, 2015).

268 We now demonstrate that the NCL of crows also shows gamma modulation of the LFP,  
269 importantly in the absence of motor planning or execution, and directly linked to cognition. This is  
270 despite the anatomical differences between the layered PFC and nuclear NCL, in terms of the  
271 architecture of the telencephalon at this mesoscale. Therefore, the firmly established equivalency  
272 of avian NCL to mammalian PFC, both functionally (Nieder, 2017) and through its macro anatomy  
273 (Güntürkün & Bugnyar, 2016), also holds for its LFP dynamics. This expands our knowledge

274 about how higher cognition (WM) arises in birds, i.e. following the same oscillatory dynamics  
275 observed in mammals.

### 276 **Gamma modulation related to WM**

277 Remarkably, the telencephalic LFP power dynamics in the gamma frequency range is observed  
278 across species in a similar fashion: it was elevated during stimulus encoding, contained  
279 information about stimulus location, reduced during the early delay, and ramping up towards the  
280 end of the delay (Kornblith et al., 2016; Lundqvist et al., 2016).

281 The observation that gamma oscillations have similar cognitive correlates in crows as in  
282 mammals, despite key anatomical differences, could point towards a key functional advantage of  
283 rhythmic population activity. This argument was previously made based on the conserved  
284 temporal properties across vastly different mammalian brain sizes (Buzsáki et al., 2013). Cortical  
285 gamma is thought to implement a winner-take-all algorithm (Fig. 4C) that simultaneously  
286 promotes selective neuronal activity without runaway excitation due to divisive normalization  
287 (Fries, 2015; Lundqvist et al., 2010). Together with analysis from single-neuron activity in crows  
288 (Hahn et al., 2021), it suggests that crow gamma could have a similar role in selection and  
289 normalization despite being implemented on a different neural substrate.

290 We also report that avian gamma is 'bursty' rather than a continuous and prolonged increase in  
291 power. The smooth elevation during stimulus encoding and the smooth increase during the end  
292 of the delay was visible only in the trial averages, at the single-trial level it was only elevated  
293 above baseline in brief bursts. Such bursts of gamma have also been observed in human and  
294 non-human primate cortex (Kucewicz et al., 2017; Lundqvist et al., 2016; Lundqvist, Herman,  
295 Warden, et al., 2018). They provide support for models in which WM information is retained by a  
296 combination of spiking and synaptic mechanisms (Fig. 4E; (Lundqvist et al., 2011; Mongillo et al.,  
297 2008; Sandberg et al., 2003)). The role of the bursts may be to facilitate reliable synaptic  
298 transmission (Lisman, 1997) and to leave a plastic synaptic mark of WM at the synapse (Miller et  
299 al., 2018). This, and other related findings, have motivated models of WM in which retention can  
300 be achieved by 'activity silent' mechanisms, i.e., synaptic plasticity following bursts of spiking  
301 (Lundqvist, Herman, & Miller, 2018; Miller et al., 2018; Sreenivasan & D'Esposito, 2019).  
302 However, there is an ongoing debate over these models and the more classical model of WM  
303 retention through observable sustained spiking (Constantinidis et al., 2018; Wang, 2021).

304 In addition to gamma oscillations, we also observed lower frequency oscillations (4-25 Hz). Similar  
305 to alpha/beta oscillations in primates, these largely showed the opposite behavior as the gamma  
306 oscillations over time (elevated when gamma was suppressed and vice versa). In cortical

307 networks, alpha/beta oscillations are thought to play an inhibitory role and suppress gamma and  
308 the associated processing of sensory information (Händel et al., 2011; Jensen & Mazaheri, 2010;  
309 Lundqvist et al., 2016). Gamma band activity, in contrast, is associated with active encoding and  
310 decoding of WM information, e.g., when information has to enter WM, or when it is retrieved  
311 (Lundqvist et al., 2016; Roux et al., 2012; Sederberg et al., 2003). Thus, during these gamma  
312 active phases, the neuronal networks are plastic. Alpha/beta band activity is associated with  
313 retention (e.g., during the delay) that safeguards encoded information against perturbation. Our  
314 data are largely in line with these ideas, although we also observed some deviations from such  
315 mammalian data and model-predictions as outlined above.

### 316 **Deviations from mammalian models**

317 Despite these striking similarities in the overall modulation of oscillatory activity by task epochs  
318 between birds and mammals, we also observed key deviations, in particular for load-dependent  
319 effects: despite gamma increasing during WM-encoding (load 1 vs load 0), it subsequently  
320 decreased with load. This is in stark contrast to studies from human and non-human primates in  
321 which gamma increases monotonically with load (Howard et al., 2003; Kornblith et al., 2016;  
322 Lundqvist et al., 2016; Meltzer et al., 2008; Roux et al., 2012).

323 From a modeling perspective, this pattern could potentially be explained by an increase of  
324 simultaneously active populations as load increases. Each population codes for distinct items.  
325 Due to the lack of columnar alignment, they could potentially cancel out each other's contribution  
326 to the measured field when more than one is active (in contrast to the cortical alignment, Fig. 4D).  
327 However, the positive correlation between load and gamma at the end of the delay and in the  
328 choice period could speak against an anatomical explanation for this cross-species discrepancy.  
329 It should also be noted that single-neuron spiking only showed a load-dependent effect towards  
330 the end of the delay (where it increased with load, similar to mammals), suggesting there are  
331 cross-species differences in the population activity, particularly at encoding and not only in the  
332 measured LFP. This poses a challenge to existing models of working memory that tend to assume  
333 increased cognitive load is supported by increased (or at least not decreasing) population activity  
334 (Lundqvist et al., 2011). Another possible explanation could be that the birds processed the  
335 memory items differently during the sample and at the end of the delay. Because memory items  
336 were presented simultaneously, the birds might have processed them as one during the sample,  
337 but then shifted to an individual representation during the delay, like cycling through the individual  
338 colors one by one. Task-dependent changes, depending on the behavioral relevance, in the  
339 neural representations of WM items, have been reported in monkeys (Panichello & Buschman,

340 2021). If there's a difference between those modes, it might explain why our observations are  
341 congruent with those of monkeys from a full sequential version of the task only at the end of the  
342 delay (Lundqvist et al., 2016).

343 We cannot exclude the possibility that some methodological differences (in comparison to  
344 monkeys) could have caused our observed deviations. We trained our birds to retain head fixation  
345 without restraining them which might have caused effort-related signals that attenuated some  
346 effects. Similarly, we did not explicitly control for eye movements. Importantly though, these  
347 differences were necessary to attain recordings that would allow our novel LFP analysis of purely  
348 task-related cognition. Motor-related activity in particular would have hindered such isolated  
349 analysis. Overall, the complex pattern with different load effects during encoding and choice, and  
350 non-monotonic changes from load 0 to load 3, points towards intriguing differences in the evolved  
351 implementations between mammals and birds. In addition, while gamma and alpha/beta tended  
352 to be elevated and suppressed in different parts of the trials, this relationship did not seem as  
353 strong as that in primates. For instance, the load effects for gamma and beta bursts went in the  
354 same, not opposite, directions as one would expect if they were anti-correlated.

355 The fact that birds have similar WM capacity, and striking similarities in the neural WM activity,  
356 makes these differences more relevant as clues towards what dynamical features are vital to  
357 support higher order cognition. Future modelling and avian neurophysiological studies hold  
358 significant promise to reveal such principles.

## 359 **Methods**

360 Our animals, experimental setup, behavioral protocol, recording setup, and surgical procedures  
361 were previously described in (Hahn et al., 2021).

### 362 **Subjects**

363 We worked with two hand-raised carrion crows (*Corvus corone*), held under identical housing and  
364 food protocols as described in (Hahn et al., 2021). All experimental procedures and housing  
365 conditions were carried out in accordance with the National Institutes of Health Guide for Care  
366 and Use of Laboratory Animals and were authorized by the national authority (LANUV).

### 367 **Experimental setup**

368 Our setup consisted of an operant training chamber outfitted with a touchscreen (22", ELO 2200  
369 L APR, Elo Touch Solutions Inc., CA) and an automatic feeder delivering food reward upon correct  
370 pecks on the touchscreen. We used two computer vision cameras ('Pixy', CMUcam5, Charmed  
371 Labs, Tx) to track the birds' head position via a mount of two lightweight 3D-printed LEDs that

372 was removed after each experimental session. Head-location was acquired at 50 Hz and data  
373 was smoothed by integrating over 2 frames in Matlab using custom programs on a control PC.  
374 The behavioral paradigm was executed by custom code written in Matlab using the  
375 Psychophysics (Brainard, 1997) and Biopsychology toolboxes (Rose et al., 2008). Further details  
376 about the experimental setup have been reported in (Hahn et al., 2021).

### 377 **Behavioral protocol**

378 We trained the birds to perform a delayed non-match to sample task, previously used to test the  
379 performance under different working memory loads in primates (Buschman et al., 2011). The  
380 protocol has previously been reported by Hahn et al., (2021). Trials started with the presentation  
381 of a red dot centered on the touchscreen (for a maximum of 40 s). Centering of the head in front  
382 of the red dot for 160 ms caused the red dot to disappear and a stimulus array of two to five  
383 colored squares to appear (Fig. 1A, 'sample'). The sample was presented for 800 ms, while the  
384 animals had to maintain head fixation and center their gaze on the screen ('hold gaze', no more  
385 than 2 cm horizontal or vertical displacement, and no more than 20° horizontal or vertical rotation).  
386 Failure to retain head fixation resulted in an aborted trial. The sample phase was followed by a  
387 memory delay of 1000 ms after which the stimulus array reappeared with one color exchanged.  
388 The animal indicated which of the colors had changed by pecking the respective square. Correct  
389 responses were rewarded probabilistically (BEO special pellets, in 55 % of correct trials, additional  
390 2 s illumination of the food receptacle in 100 % of correct trials). Incorrect responses to colors that  
391 had not changed or a failure to respond within 4 s resulted in a brief screen flash and a 10 s  
392 timeout. Individual trials were separated by a 2 s inter-trial interval.

393 The colored squares were presented at six fixed locations on the screen (1 – 6, Fig. 1A). In each  
394 session, one pair of colors was assigned to each of the six locations. Each location had its own  
395 distinct pair. These pairs were randomly chosen from a pool of 14 colors (two color combinations  
396 were excluded since the animals did not discriminate them equally well during a pre-training). Fig.  
397 1A gives an example. The color-change occurs for the middle right where blue (B) is presented  
398 during the sample and green (G) during the choice. In this particular session, the middle-right  
399 location could thus show either of the following colors during the sample and choice: B-G (shown  
400 in Fig. 1A); G-B; G-G; B-B; None-None. On the next session, a new random pair of colors were  
401 displayed at this location. The order of presentation of colors within a pair, the target location  
402 (where the color change occurred), and the number of stimuli in the array (two to five) were  
403 randomized and balanced across trials so that each condition had an equal likelihood to appear.  
404 The width of the colored squares was 10 degrees of visual angle (DVA) and squares were placed



405 on the horizontal meridian of the screen and at 45.8 DVA above or below the meridian at a  
406 distance of 54 and 55.4 DVA from the center. The binocular visual field of crows is 37.6 DVA  
407 (Troscianko et al., 2012). With our arrangement on screen, combined with the head tracking, we  
408 ensured that all stimuli appeared only outside of this binocular range.

## 409 **Surgery**

410 The surgery protocol was identical to the one reported by Hahn et al., (2021). Both animals were  
411 chronically implanted with a lightweight head-post to attach a small LED holder during the  
412 experiments. Before surgery, animals were deeply anesthetized with ketamine (50 mg/kg) and  
413 xylazine (5 mg/kg). Once deeply anesthetized, animals were placed in a stereotaxic frame. After  
414 attaching the small head-post with dental acrylic, a microdrive with a multi-channel microelectrode  
415 was stereotactically implanted at the craniotomy (Neuronexus Technologies Inc., Ann Arbor MI,  
416 DDrive). The electrode was positioned in NCL (AP 5.0, ML 13.0) of the left hemisphere  
417 (coordinates for the region based on histological studies on the localization of NCL in crows (Veit  
418 & Nieder, 2013). After the surgery, the crows received analgesics.

## 419 **Electrophysiological recordings of single-cell activity and LFP**

420 Recordings of neuronal activity (local field potentials and single-cell spiking) were performed using  
421 chronically implanted multi-channel microelectrodes. The distance between individual recording  
422 sites (electrodes) was 50  $\mu\text{m}$ . The signal was amplified, filtered, and digitized using Intan  
423 RHD2000 headstages and a USB-Interface board (Intan Technologies LLC, Los Angeles CA).  
424 The system also recorded digital event codes that were sent from the behavioral control PC using  
425 a custom IO-device (details available at [www.jonasrose.net](http://www.jonasrose.net)). Before each recording session, the  
426 electrodes were advanced manually using the microdrive. Recordings were started 20 minutes  
427 after the advancement, and each recording site was manually checked for neuronal signals  
428 (cellular discharges observable on an audio monitor). Signals of analysis of LFP were recorded  
429 at a sampling rate of 30 kHz and filtered with a band-pass filter at recording (1 Hz - 7.5 kHz). LFP  
430 signals were then further processed by offline down-sampling to 1 kHz. For analysis, we chose to  
431 systematically sub-sample a quarter of all electrodes used (i.e., analyzing signals from every  
432 fourth electrode, thereby achieving a reduced overlap of signal with 200  $\mu\text{m}$  distance between  
433 electrodes). To verify our results we applied analysis to a second, independent subsample of the  
434 electrodes. Qualitative results from this second subsample were comparable. Data of single-cell  
435 neuronal activity for analysis of the spiking rate of the neuronal population (SFig. 5), was obtained  
436 from our previous study (Hahn et al., 2021).

## 437 **Processing of LFP results**

438 Prior to extracting frequency power from our signals, we removed possible spike-related traces  
439 from the LFP signals using the algorithm of (Banaie Boroujeni et al., 2020). We further processed  
440 our LFP signals using the FieldTrip open-source software package for Matlab (Oostenveld et al.,  
441 2010). We extracted frequency power from the signals using Morlet-wavelet convolution with a  
442 Morlet family of 99 frequencies (2-100 Hz), with seven wavelet cycles. We screened all trials for  
443 unique trial artifacts centered around 50 Hz during processing. On rare occasions electrodes had  
444 individual trials that showed magnitudes of frequency power up to three magnitudes of power  
445 larger than the next biggest power value, we handled such artifacts by restricting data analysis to  
446 the 99<sup>th</sup> percentile of power values on any electrode (i.e., excluding trials from analysis whose  
447 power values fell into the top 1 % of observed values). During manual curation of results we  
448 nonetheless observed a few electrodes with power levels exceeding their average levels at  
449 distinct time points over all frequencies (i.e. power surges not restricted to any specific frequency).  
450 Those electrodes ( $n = 31$ ) were subsequently removed from data analysis altogether.

## 451 **Statistical testing of power during the trial against baseline power**

452 We tested frequency power during the trial (in load conditions 1-3, at a 1 ms time resolution,  
453 across all individual frequencies) against baseline frequency power using a dependent samples  
454 t-statistic (i.e., testing the trial phase for a specific load against its baseline during the preceding  
455 ITI) using a permutation approach implemented in the FieldTrip toolbox. The method compares  
456 the observed t-statistic of the data (i.e., trial vs. baseline) to a null-distribution t-statistic of the  
457 permuted dataset. We used 1000 permutations, an alpha level of 5 % to determine significance,  
458 and an extreme distribution of statistical values to correct for multiple comparisons (i.e., correction  
459 was achieved by comparing observed statistical values against the most extreme (minimal and  
460 maximal) permuted values).

## 461 **Calculating gamma modulation of individual electrodes**

462 We determined if an electrode was 'gamma modulated' by performing the statistical testing  
463 described above for the average power of the 'low gamma band' (30-59 Hz) at load 1, in 100 ms  
464 bins with 100 ms steps for the interval beginning at sample start until delay end. We classified  
465 electrodes as gamma modulated if two consecutive, non-overlapping bins had been classified as  
466 significant.

## 467 **Statistical testing of power at different loads**

468 We tested the average change in power per added item in five frequency bands (3-7 Hz 'theta',  
469 8-12 Hz 'alpha', 13-19 Hz 'beta', 30-59 Hz 'low gamma', and 83-98 Hz 'high gamma') in bins of

470 100 ms with a step size of 100 ms. To do so we first calculated the average power within each  
471 frequency band and bin then normalized the average power of each electrode relative to its load  
472 1 condition (i.e., so that power at load 1 was 1 and powers at load 2 and 3 were relative to that),  
473 and finally calculated the average between the differences of load1 and load 2, and load 2 and  
474 load 3 (Eq. 1).

475 Equation 1:  $Power\Delta_{item} = \frac{\Delta_{load1,load2} + \Delta_{load2,load3}}{2}$

476 We tested if  $Power\Delta_{item}$  was significant by performing a t-test of each individual value against the  
477 null-hypothesis that it was non-different from 0, and corrected for multiple comparisons using the  
478 Bonferroni method (i.e.,  $\alpha_{crit.} = 0.0013$ ). We calculated the effect size of the load effect quantified  
479 by  $Power\Delta_{item}$  by performing a repeated measures ANOVA (measurements for each electrode  
480 at loads 1-3 respectively) over all electrodes and calculating the effect size ( $\omega^2$ ) for all individual  
481 bins (Eq. 2).

482 Equation 2:  $\omega^2 = \frac{SS_{effect} - (df_{load} * MS_{error})}{SS_{total} + MS_{error}}$

### 483 **Model comparison for location information**

484 To investigate if LFP power contained information about the location of presented stimuli we  
485 performed a comparison of generalized linear models (GLM) applying the method of (Kornblith et  
486 al., 2016), for comparability of results. We compared a 'full model', containing nested load and  
487 location information, to two 'reduced models' where we removed location information about the  
488 ipsilateral, or contralateral locations, and replaced the respective position indicators with their  
489 sum. Each model was calculated assuming a normal distribution and its canonical 'identity' link  
490 function ( $f(\mu) = \mu$ ). For comparison, we also assumed a gamma distribution together with its  
491 canonical link function ( $f(\mu) = \frac{1}{\mu}$ ). Results of both approaches were similar, but model parameters  
492 indicated that the assumption of gamma distribution did not fit all electrodes' data, whereas the  
493 normal assumption did. We, therefore, decided to report the results of the normal models. The full  
494 model was a GLM with frequency-band power as response variable and the six possible locations  
495 as predictors. Each of the six predictors was therefore encoded as either 0 (no color at the  
496 location) or 1 (color at the location). For the reduced model we replaced three of the location  
497 indicators (either those for the contralateral locations 4-6 or those for the ipsilateral locations 1-  
498 3), by their cumulative load (i.e., 0 - 3). The reduced models thereby lacked information about the  
499 respective locations, which, if they were informative about the LFP power, would reduce the model  
500 fit (quantified by  $R_{adj}^2$ ). The difference between the model fits (i.e.,  $\Delta R_{adj}^2$ ) then indicates how

501 much information was contained by the respective sides locations. We calculated this model  
502 comparison for six 400 ms bins, with a step size of 400 ms, starting 400 ms before sample onset  
503 and ending 200 ms after choice onset. We calculated if  $\Delta R_{adj}^2$  was significant in a particular bin  
504 by comparing  $\Delta R_{adj}^2$  to a null-distribution  $\Delta R_{adj.Null}^2$  generated from the data by permutation of the  
505 data labels prior to performing the model comparison 1000 times.  $\Delta R_{adj}^2$  was considered  
506 significant if it was bigger than 99.17 % of permuted  $\Delta R_{adj.Null}^2$  values (i.e., at an alpha level of  
507 5 %, after Bonferoni correction for multiple comparisons).

### 508 **Calculating burst rates**

509 Burst rates of the individual frequency bands were calculated by detecting threshold crossings of  
510 power. Frequency-band power qualifying as burst activity was defined as a power crossing a  
511 threshold of mean + 1.5\*SD, for at least two consecutive cycles (periods) of the bands center  
512 frequency. For example: to classify an increase in power as a burst in the low gamma band, power  
513 had to exceed threshold levels for  $3 * \frac{1}{centerfrequency} = 3 * \frac{1}{45 Hz} = 66 ms$ . We performed this  
514 analysis with a sliding window starting at the start of the sample phase and ending with the end  
515 of the delay.

516

517

518

519

520

521

522

523

524

## 525 **Supplementary Material**

### 526 **Supplementary section 1**

527 **Low frequencies in Fig. 2.** Local minimum during the early sample phase occurred for a band  
528 between 8 and 20 Hz: avg. Local minimum at 8 Hz, 238 ms:  $3.1780 \times 10^6 \pm 3.4119 \times 10^5$ ). The  
529 frequency band between 4 and 20 Hz had minimal power at the end of the delay (avg. local  
530 minimum within significant region at 16 Hz, 1723 ms:  $2.6861 \times 10^6 \pm 3.6926 \times 10^5$ ).

531 **High frequencies in Fig. 2.** Power peaks of the higher frequencies were clustered in a band  
532 centered around 47 Hz during the middle of the sample phase (avg. local maximum of the sample  
533 phase ( $\pm$ standard error of the mean (SEM)) within significant region at 47 Hz, 483 ms:  $1.4211 \times 10^7$   
534  $\pm 2.0555 \times 10^6$ ) and several smaller power peaks occurred throughout the delay phase (Fig. 2).

535

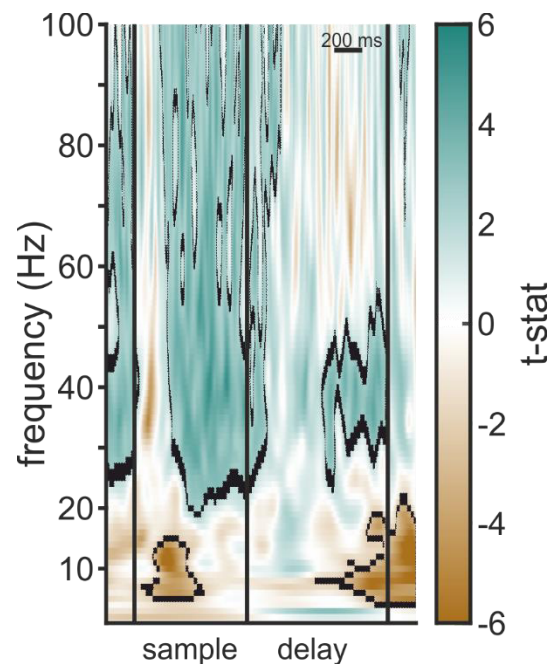

536

537 SFigure 1: Statistical values of example electrode (Fig. 2). T-values of the significance test of load 1 vs.  
538 baseline, axes are identical to those in Fig. 2. Positive values (green) indicate that power was larger than  
539 baseline, negative values (brown) indicate that power was smaller than baseline.

540

541

542

## 543 **Supplementary section 2**

544 **Gamma power modulation throughout NCL:** The peaks in power in the high gamma frequency  
545 bands were the most prominent observation at the level of individual electrodes. Was this a  
546 general effect throughout the extent of NCL or was it localized only at specific electrodes, as has  
547 been observed in monkey PFC (Lundqvist et al., 2016)? We determined if our electrodes could  
548 be classified into 'gamma-modulated' and 'non-modulated' sites, by calculating significance of a  
549 low (32-47 Hz) and high gamma (60-100 Hz) band during the sample phase for each of our  
550 electrodes (see methods for details). We found that power in the low gamma band was  
551 significantly modulated at 81.64 % of electrodes (76.72 % for high gamma). The electrodes  
552 without significant gamma modulation came from recordings obtained at locations within  
553 individual sessions (i.e., sessions in which there was no gamma modulation detected at any site),  
554 i.e., gamma modulation was either present or absent at the sites of any given recording session.

555 Interestingly, due to the direction of the load effect (i.e., decreasing and increasing power of the  
556 high and low-frequency bands, respectively) higher loads seemed to push power levels closer to  
557 baseline levels for both frequency bands, while an overall activation (gamma bands), or  
558 suppression (theta to beta bands) of power was present (Fig. 3A, C & E).

## 559 **Supplementary section 3**

560 **Power modulation based on the location of stimuli:** Power of LFP contained information about  
561 the location of the colored square, mainly about the contralateral locations, but not for the  
562 ipsilateral locations. The absolute amount of information contained in LFP power in our data  
563 seemed to be slightly higher than that observed in monkeys (Kornblith et al., 2016). Position  
564 information was only present during the sample phase, not during the delay, and only for the  
565 positions contralateral to the electrode site, this indicates that gamma power plays a part in  
566 processing stimulus location unihemispherically. The optic nerve of birds is fully decussated, i.e.  
567 information observed by the right eye ends up (via the major visual pathway) exclusively in the  
568 left hemisphere (Husband & Shimizu, 2001). We designed our task to make use of this  
569 neuroanatomical isolation. Birds had to retain head fixation so that stimuli of the right side of the  
570 screen (the side contralateral to electrode implantation) were only visible to the right eye. Our  
571 results seem to reflect this manipulation indicating that interhemispheric 'cross talk' did not happen  
572 during WM encoding in the sample phase, suggesting independent hemispheric processing. This  
573 is in line with results from monkeys (Brincat et al., 2021; Buschman et al., 2011; Kornblith et al.,  
574 2016) and the behavioral results of this study (Balakhonov and Rose, 2017).

575

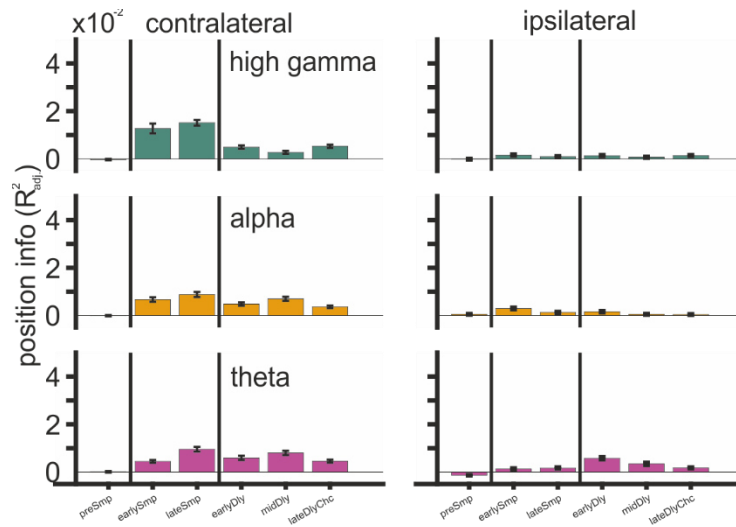

576

577 SFigure 2: Position information ( $\Delta R_{adj}^2$ ) contained in average power of the theta, alpha, and high gamma  
578 bands (400 ms bins).

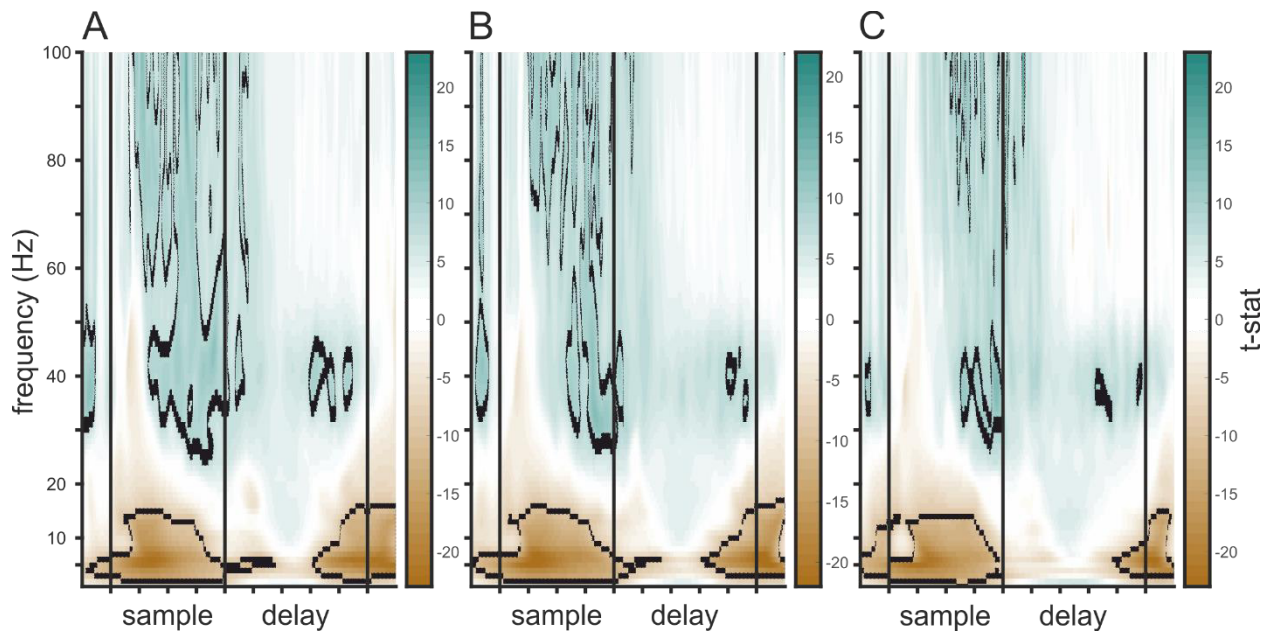

579

580 SFigure 3: Statistical values of all significant electrodes, axes are identical to those in Fig. 3E. (A) T-values  
581 of the significance test of load 1 vs. baseline. (B) T-values of the significance test of load 2 vs. baseline.  
582 (C), T-values of the significance test of load 3 vs. baseline.

583

584

585 **Supplementary section 4**

586 Bursts were also present in the alpha and high gamma frequency bands, where bursts occurred  
 587 during early sample, reducing with load and remaining load-independent at a stable level during  
 588 late sample, before gradually reducing throughout the delay (SFigure 4, table 4 & 5).

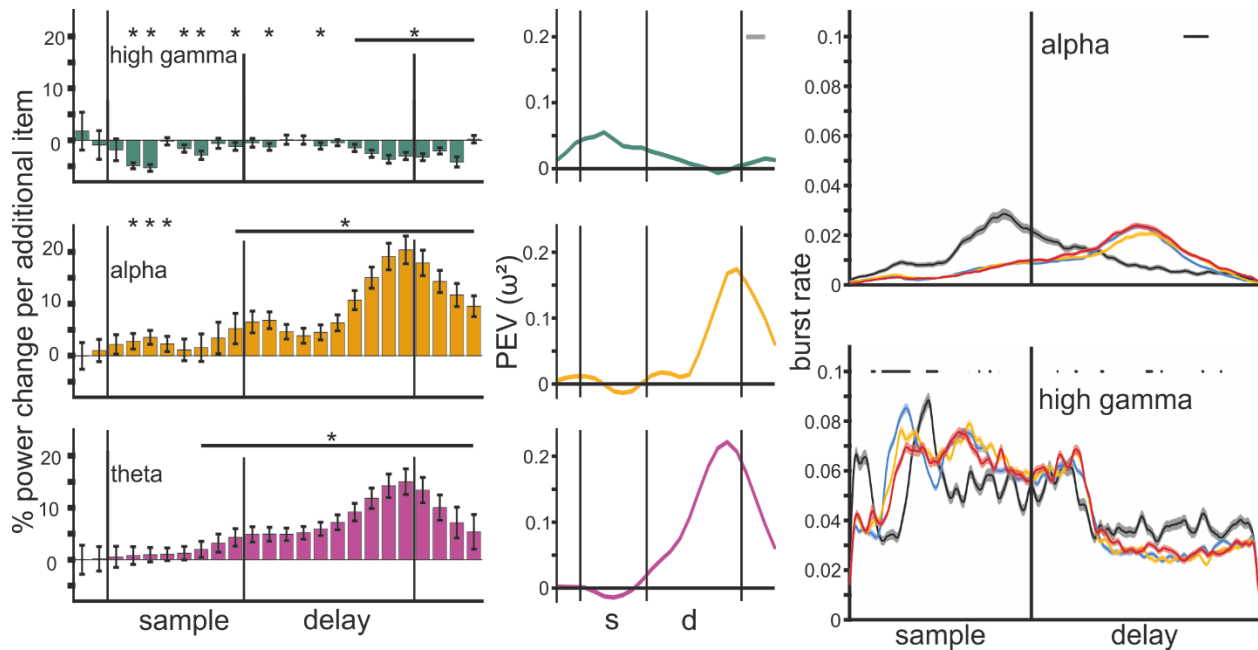

589 SFigure 4: Left column: Average change in power per added item (100 ms bins) for the theta, alpha, and  
 591 high gamma band. Middle: Quantification of the load effect depicted in the left column, as percent explained  
 592 variance by factor power ( $\omega^2$ ). Right column: Trial burst rate of alpha and high gamma frequency bands  
 593 during the trial at gamma modulated sites. Black bars indicate consecutive significance between loads 1-3  
 594 ( $p < 0.05$ ) over 2 cycles of the bands center frequency.

595

596 **Neuronal spiking of the population.** We also compared the load effect of bursts to the spiking  
 597 activity of the neurons recorded at the same time. The population of neurons increased its spiking  
 598 rate during the early sample period and then gradually reduced it throughout the rest of the trial  
 599 until the choice phase (SFigure 5). Load only significantly affected spiking rate towards the end of  
 600 the delay, with higher loads slightly increasing spiking rate ( $F(1,2) = 1.3$ ,  $p = 0.001$ ,  $\omega^2 = 0.01$ ,  
 601 posthoc comparisons between load 1/2 and load 2/3, both  $p < 0.05$ ).

602



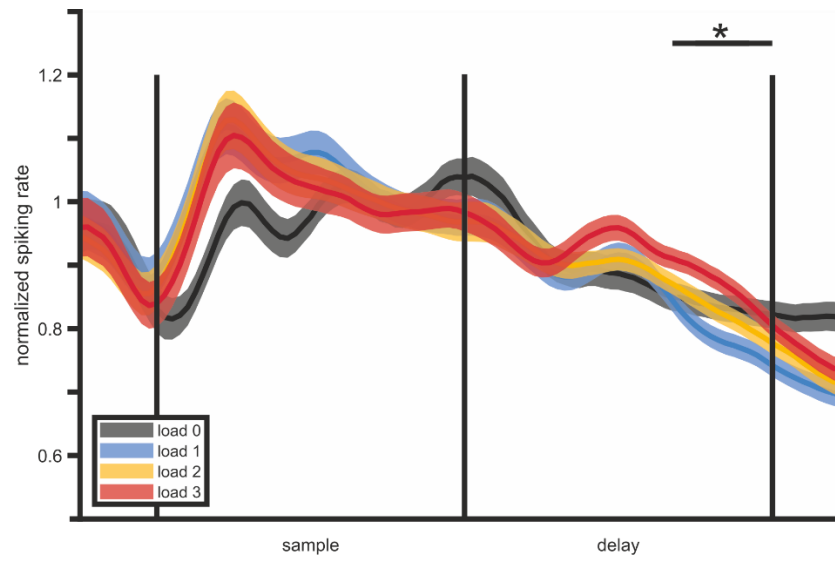

603

604 SFigure 5: Normalized spiking rate of the neuronal population recorded during the task. The black horizontal  
605 bar indicates a significant difference between load conditions.

606

607

## 608 **References**

- 609 Baddeley, A. D., & Hitch, G. (1974). Working Memory. In G. H. Bower (Hrsg.), *Psychology of*  
610 *Learning and Motivation* (OBB4031-8; Bd. 8, S. 47–89). Academic Press.  
611 <http://www.sciencedirect.com/science/article/pii/S0079742108604521>
- 612 Baddeley, A. D., Hitch, G., & Allen, R. (2021). A Multicomponent Model of Working Memory. In  
613 R. H. Logie, V. Camos, & N. Cowan (Hrsg.), *Working Memory State of the Science* (First  
614 Edition, S. 10–43). Oxford University Press.
- 615 Balakhonov, D., & Rose, J. (2017). Crows Rival Monkeys in Cognitive Capacity. *Scientific*  
616 *Reports*, 7(1), 8809. <https://doi.org/10.1038/s41598-017-09400-0>
- 617 Banaie Boroujeni, K., Tiesinga, P., & Womelsdorf, T. (2020). Adaptive spike-artifact removal  
618 from local field potentials uncovers prominent beta and gamma band neuronal  
619 synchronization. *Journal of Neuroscience Methods*, 330, 108485.  
620 <https://doi.org/10.1016/j.jneumeth.2019.108485>
- 621 Bastos, A. M., Loonis, R., Kornblith, S., Lundqvist, M., & Miller, E. K. (2018). Laminar recordings  
622 in frontal cortex suggest distinct layers for maintenance and control of working memory.  
623 *Proceedings of the National Academy of Sciences*, 115(5), 1117–1122.  
624 <https://doi.org/10.1073/pnas.1710323115>
- 625 Benton, M. J., & Donoghue, P. C. J. (2007). Paleontological Evidence to Date the Tree of Life.  
626 *Molecular Biology and Evolution*, 24(1), 26–53. <https://doi.org/10.1093/molbev/msl150>
- 627 Brainard, D. H. (1997). The psychophysics toolbox. *Spatial Vision*, 10(4), 433–436.  
628 <https://doi.org/10.1163/156856897x00357>
- 629 Brincat, S. L., Donoghue, J. A., Mahnke, M. K., Kornblith, S., Lundqvist, M., & Miller, E. K.  
630 (2021). Interhemispheric transfer of working memories. *Neuron*, 109(6), 1055-1066.e4.  
631 <https://doi.org/10.1016/j.neuron.2021.01.016>

- 632 Brown, D. E., Chavez, J. I., Nguyen, D. H., Kadwory, A., Voytek, B., Arneodo, E. M., Gentner, T.  
633 Q., & Gilja, V. (2021). Local field potentials in a pre-motor region predict learned vocal  
634 sequences. *PLOS Computational Biology*, *17*(9), e1008100.  
635 <https://doi.org/10.1371/journal.pcbi.1008100>
- 636 Buffalo, E. A., Fries, P., Landman, R., Buschman, T. J., & Desimone, R. (2011). Laminar  
637 differences in gamma and alpha coherence in the ventral stream. *Proceedings of the*  
638 *National Academy of Sciences*, *108*(27), 11262–11267.  
639 <https://doi.org/10.1073/pnas.1011284108>
- 640 Buschman, T. J., Siegel, M., Roy, J. E., & Miller, E. K. (2011). Neural substrates of cognitive  
641 capacity limitations. *Proceedings of the National Academy of Sciences*, *108*(27), 11252–  
642 11255. <https://doi.org/10.1073/pnas.1104666108>
- 643 Buzsáki, G., Anastassiou, C. A., & Koch, C. (2012). The origin of extracellular fields and  
644 currents—EEG, ECoG, LFP and spikes. *Nature Reviews Neuroscience*, *13*(6), 407–420.  
645 <https://doi.org/10.1038/nrn3241>
- 646 Buzsáki, G., Logothetis, N., & Singer, W. (2013). Scaling Brain Size, Keeping Timing:  
647 Evolutionary Preservation of Brain Rhythms. *Neuron*, *80*(3), 751–764.  
648 <https://doi.org/10.1016/j.neuron.2013.10.002>
- 649 Buzsáki, G., & Wang, X.-J. (2012). Mechanisms of Gamma Oscillations. *Annual Review of*  
650 *Neuroscience*, *35*, 203–225. <https://doi.org/10.1146/annurev-neuro-062111-150444>
- 651 Cardin, J. A., Carlén, M., Meletis, K., Knoblich, U., Zhang, F., Deisseroth, K., Tsai, L.-H., &  
652 Moore, C. I. (2009). Driving fast-spiking cells induces gamma rhythm and controls  
653 sensory responses. *Nature*, *459*(7247), 663–667. <https://doi.org/10.1038/nature08002>
- 654 Carlén, M., Meletis, K., Siegle, J. H., Cardin, J. A., Futai, K., Vierling-Claassen, D., Rühlmann,  
655 C., Jones, S. R., Deisseroth, K., Sheng, M., Moore, C. I., & Tsai, L.-H. (2012). A critical  
656 role for NMDA receptors in parvalbumin interneurons for gamma rhythm induction and  
657 behavior. *Molecular Psychiatry*, *17*(5), 537–548. <https://doi.org/10.1038/mp.2011.31>

- 658 Constantinidis, C., Funahashi, S., Lee, D., Murray, J. D., Qi, X.-L., Wang, M., & Arnsten, A. F. T.  
659 (2018). Persistent Spiking Activity Underlies Working Memory. *Journal of Neuroscience*,  
660 38(32), 7020–7028. <https://doi.org/10.1523/JNEUROSCI.2486-17.2018>
- 661 Dheerendra, P., Lynch, N. M., Crutwell, J., Cunningham, M. O., & Smulders, T. V. (2018). In  
662 vitro characterization of gamma oscillations in the hippocampal formation of the  
663 domestic chick. *European Journal of Neuroscience*, 48(8), 2807–2815.  
664 <https://doi.org/10.1111/ejn.13773>
- 665 Ditz, H. M., & Nieder, A. (2016). Numerosity representations in crows obey the Weber–Fechner  
666 law. *Proceedings of the Royal Society B: Biological Sciences*, 283(1827), Article 1827.  
667 <https://doi.org/10.1098/rspb.2016.0083>
- 668 Ditz, H. M., & Nieder, A. (2020). Format-dependent and format-independent representation of  
669 sequential and simultaneous numerosity in the crow endbrain. *Nature Communications*,  
670 11(1), 1–10. <https://doi.org/10.1038/s41467-020-14519-2>
- 671 Einevoll, G. T., Kayser, C., Logothetis, N. K., & Panzeri, S. (2013). Modelling and analysis of  
672 local field potentials for studying the function of cortical circuits. *Nature Reviews*  
673 *Neuroscience*, 14(11), 770–785. <https://doi.org/10.1038/nrn3599>
- 674 Emery, N. J., & Clayton, N. S. (2004). The Mentality of Crows: Convergent Evolution of  
675 Intelligence in Corvids and Apes. *Science*, 306(5703), 1903–1907.  
676 <https://doi.org/10.1126/science.1098410>
- 677 Fries, P. (2015). Rhythms for Cognition: Communication through Coherence. *Neuron*, 88(1),  
678 220–235. <https://doi.org/10.1016/j.neuron.2015.09.034>
- 679 Gibson, B., Wasserman, E., & Luck, S. J. (2011). Qualitative similarities in the visual short-term  
680 memory of pigeons and people. *Psychonomic Bulletin & Review*, 18(5), 979.  
681 <https://doi.org/10.3758/s13423-011-0132-7>

- 682 Goddard, C. A., Sridharan, D., Huguenard, J. R., & Knudsen, E. I. (2012). Gamma Oscillations  
683 Are Generated Locally in an Attention-Related Midbrain Network. *Neuron*, *73*(3), 567–  
684 580. <https://doi.org/10.1016/j.neuron.2011.11.028>
- 685 Güntürkün, O., & Bugnyar, T. (2016). Cognition without Cortex. *Trends in Cognitive Sciences*,  
686 *20*(4), 291–303. <https://doi.org/10.1016/j.tics.2016.02.001>
- 687 Güntürkün, O., Stacho, M., & Ströckens, F. (2020). The Brains of Reptiles and Birds. In J. H.  
688 Kaas (Hrsg.), *Evolutionary Neuroscience (Second Edition)* (S. 159–212). Academic  
689 Press. <https://www.sciencedirect.com/science/article/pii/B9780128205846000088>
- 690 Hahn, L. A., Balakhonov, D., Fongaro, E., Nieder, A., & Rose, J. (2021). Working memory  
691 capacity of crows and monkeys arises from similar neuronal computations. *eLife*, *10*,  
692 e72783. <https://doi.org/10.7554/eLife.72783>
- 693 Händel, B. F., Haarmeier, T., & Jensen, O. (2011). Alpha Oscillations Correlate with the  
694 Successful Inhibition of Unattended Stimuli. *Journal of Cognitive Neuroscience*, *23*(9),  
695 2494–2502. <https://doi.org/10.1162/jocn.2010.21557>
- 696 Harris, K. D., & Shepherd, G. M. G. (2015). The neocortical circuit: Themes and variations.  
697 *Nature Neuroscience*, *18*(2), 170–181. <https://doi.org/10.1038/nn.3917>
- 698 Herold, C., Palomero-Gallagher, N., Hellmann, B., Kroner, S., Theiss, C., Güntürkün, O., &  
699 Zilles, K. (2011). The receptor architecture of the pigeons' nidopallium caudolaterale: An  
700 avian analogue to the mammalian prefrontal cortex. *Brain Structure & Function*, *216*(3),  
701 239–254. <https://doi.org/10.1007/s00429-011-0301-5>
- 702 Honig, W. K. (1978). Studies of Working Memory in the Pigeon. In *Cognitive Processes in*  
703 *Animal Cognition*, Stewart H. Hulse, Harry Fowler, Werner K. Honig (eds.) (S. 211–248).  
704 Lawrence Erlbaum Associates, Inc.
- 705 Howard, M. W., Rizzuto, D. S., Caplan, J. B., Madsen, J. R., Lisman, J., Aschenbrenner-  
706 Scheibe, R., Schulze-Bonhage, A., & Kahana, M. J. (2003). Gamma Oscillations

- 707 Correlate with Working Memory Load in Humans. *Cerebral Cortex*, 13(12), 1369–1374.  
708 <https://doi.org/10.1093/cercor/bhg084>
- 709 Husband, S., & Shimizu, T. (2001). Evolution of the Avian Visual System. In *Avian visual*  
710 *cognition [On-line]*. Available: [Pigeon.psy.tufts.edu/avc/husband/](http://www.pigeon.psy.tufts.edu/avc/husband/).  
711 <http://www.pigeon.psy.tufts.edu/avc/husband/>
- 712 Jensen, O., & Mazaheri, A. (2010). Shaping Functional Architecture by Oscillatory Alpha  
713 Activity: Gating by Inhibition. *Frontiers in Human Neuroscience*, 4, 186.  
714 <https://doi.org/10.3389/fnhum.2010.00186>
- 715 Kornblith, S., Buschman, T. J., & Miller, E. K. (2016). Stimulus Load and Oscillatory Activity in  
716 Higher Cortex. *Cerebral Cortex*, 26(9), 3772–3784.  
717 <https://doi.org/10.1093/cercor/bhv182>
- 718 Kröner, S., & Güntürkün, O. (1999). Afferent and efferent connections of the caudolateral  
719 neostriatum in the pigeon (*Columba livia*): A retro- and anterograde pathway tracing  
720 study. *Journal of Comparative Neurology*, 407(2), 228–260.  
721 [https://doi.org/10.1002/\(sici\)1096-9861\(19990503\)407:2<228::aid-cne6>3.0.co;2-2](https://doi.org/10.1002/(sici)1096-9861(19990503)407:2<228::aid-cne6>3.0.co;2-2)
- 722 Kucewicz, M. T., Berry, B. M., Kremen, V., Brinkmann, B. H., Sperling, M. R., Jobst, B. C.,  
723 Gross, R. E., Lega, B., Sheth, S. A., Stein, J. M., Das, S. R., Gorniak, R., Stead, S. M.,  
724 Rizzuto, D. S., Kahana, M. J., & Worrell, G. A. (2017). Dissecting gamma frequency  
725 activity during human memory processing. *Brain*, 140(5), 1337–1350.  
726 <https://doi.org/10.1093/brain/awx043>
- 727 Lewandowski, B. C., & Schmidt, M. (2011). Short Bouts of Vocalization Induce Long-Lasting  
728 Fast Gamma Oscillations in a Sensorimotor Nucleus. *Journal of Neuroscience*, 31(39),  
729 13936–13948. <https://doi.org/10.1523/JNEUROSCI.6809-10.2011>
- 730 Lisman, J. E. (1997). Bursts as a unit of neural information: Making unreliable synapses reliable.  
731 *Trends in Neurosciences*, 20(1), 38–43. [https://doi.org/10.1016/S0166-2236\(96\)10070-9](https://doi.org/10.1016/S0166-2236(96)10070-9)

- 732 Lundqvist, M., Compte, A., & Lansner, A. (2010). Bistable, Irregular Firing and Population  
733 Oscillations in a Modular Attractor Memory Network. *PLOS Computational Biology*, 6(6),  
734 e1000803. <https://doi.org/10.1371/journal.pcbi.1000803>
- 735 Lundqvist, M., Herman, P., & Lansner, A. (2011). Theta and Gamma Power Increases and  
736 Alpha/Beta Power Decreases with Memory Load in an Attractor Network Model. *Journal*  
737 *of Cognitive Neuroscience*, 23(10), 3008–3020. [https://doi.org/10.1162/jocn\\_a\\_00029](https://doi.org/10.1162/jocn_a_00029)
- 738 Lundqvist, M., Herman, P., & Miller, E. K. (2018). Working Memory: Delay Activity, Yes!  
739 Persistent Activity? Maybe Not. *Journal of Neuroscience*, 38(32), 7013–7019.  
740 <https://doi.org/10.1523/JNEUROSCI.2485-17.2018>
- 741 Lundqvist, M., Herman, P., Warden, M. R., Brincat, S. L., & Miller, E. K. (2018). Gamma and  
742 beta bursts during working memory readout suggest roles in its volitional control. *Nature*  
743 *Communications*, 9(1), 394. <https://doi.org/10.1038/s41467-017-02791-8>
- 744 Lundqvist, M., Rose, J., Herman, P., Brincat, S. L., Buschman, T. J., & Miller, E. K. (2016).  
745 Gamma and Beta Bursts Underlie Working Memory. *Neuron*, 90(1), 152–164.  
746 <https://doi.org/10.1016/j.neuron.2016.02.028>
- 747 Maier, A., Adams, G., Aura, C., & Leopold, D. (2010). Distinct Superficial and Deep Lamina  
748 Domains of Activity in the Visual Cortex during Rest and Stimulation. *Frontiers in*  
749 *Systems Neuroscience*, 4. <https://www.frontiersin.org/article/10.3389/fnsys.2010.00031>
- 750 Meltzer, J. A., Zaveri, H. P., Goncharova, I. I., Distasio, M. M., Papademetris, X., Spencer, S.  
751 S., Spencer, D. D., & Constable, R. T. (2008). Effects of Working Memory Load on  
752 Oscillatory Power in Human Intracranial EEG. *Cerebral Cortex*, 18(8), 1843–1855.  
753 <https://doi.org/10.1093/cercor/bhm213>
- 754 Merker, B. (2013). Cortical gamma oscillations: The functional key is activation, not cognition.  
755 *Neuroscience & Biobehavioral Reviews*, 37(3), 401–417.  
756 <https://doi.org/10.1016/j.neubiorev.2013.01.013>

- 757 Miller, E. K., Lundqvist, M., & Bastos, A. M. (2018). Working Memory 2.0. *Neuron*, *100*(2), 463–  
758 475. <https://doi.org/10.1016/j.neuron.2018.09.023>
- 759 Moll, F. W., & Nieder, A. (2015). Cross-Modal Associative Mnemonic Signals in Crow Endbrain  
760 Neurons. *Current Biology*, *25*(16), 2196–2201. <https://doi.org/10.1016/j.cub.2015.07.013>
- 761 Mongillo, G., Barak, O., & Tsodyks, M. (2008). Synaptic Theory of Working Memory. *Science*.  
762 <https://doi.org/10.1126/science.11150769>
- 763 Naud, R., & Sprekeler, H. (2018). Sparse bursts optimize information transmission in a  
764 multiplexed neural code. *Proceedings of the National Academy of Sciences*, *115*(27),  
765 E6329–E6338. <https://doi.org/10.1073/pnas.1720995115>
- 766 Neuenschwander, S., & Varela, F. J. (1993). Visually Triggered Neuronal Oscillations in the  
767 Pigeon: An Autocorrelation Study of Tectal Activity. *European Journal of Neuroscience*,  
768 *5*(7), 870–881. <https://doi.org/10.1111/j.1460-9568.1993.tb00939.x>
- 769 Nieder, A. (2017). Inside the corvid brain—Probing the physiology of cognition in crows. *Current*  
770 *Opinion in Behavioral Sciences*, *16*, 8–14. <https://doi.org/10.1016/j.cobeha.2017.02.005>
- 771 Oostenveld, R., Fries, P., Maris, E., & Schoffelen, J.-M. (2010). FieldTrip: Open Source  
772 Software for Advanced Analysis of MEG, EEG, and Invasive Electrophysiological Data.  
773 *Computational Intelligence and Neuroscience*, *2011*, e156869.  
774 <https://doi.org/10.1155/2011/156869>
- 775 Panichello, M. F., & Buschman, T. J. (2021). Shared mechanisms underlie the control of  
776 working memory and attention. *Nature*, 1–5. [https://doi.org/10.1038/s41586-021-03390-](https://doi.org/10.1038/s41586-021-03390-w)  
777 [w](https://doi.org/10.1038/s41586-021-03390-w)
- 778 Ray, S., & Maunsell, J. H. R. (2015). Do gamma oscillations play a role in cerebral cortex?  
779 *Trends in Cognitive Sciences*, *19*(2), 78–85. <https://doi.org/10.1016/j.tics.2014.12.002>
- 780 Rinnert, P., Kirschhock, M. E., & Nieder, A. (2019). Neuronal Correlates of Spatial Working  
781 Memory in the Endbrain of Crows. *Current Biology*, *29*(16), 2616-2624.e4.  
782 <https://doi.org/10.1016/j.cub.2019.06.060>



- 783 Rose, J., & Colombo, M. (2005). Neural correlates of executive control in the avian brain. *Plos*  
784 *Biology*, 3(6), 1139–1146. <https://doi.org/10.1371/journal.pbio.0030190>
- 785 Rose, J., Otto, T., & Dittrich, L. (2008). The Biopsychology-Toolbox: A free, open-source  
786 Matlab-toolbox for the control of behavioral experiments. *Journal of Neuroscience*  
787 *Methods*, 175(1), 104–107. <https://doi.org/10.1016/j.jneumeth.2008.08.006>
- 788 Roux, F., Wibral, M., Mohr, H. M., Singer, W., & Uhlhaas, P. J. (2012). Gamma-Band Activity in  
789 Human Prefrontal Cortex Codes for the Number of Relevant Items Maintained in  
790 Working Memory. *Journal of Neuroscience*, 32(36), 12411–12420.  
791 <https://doi.org/10.1523/JNEUROSCI.0421-12.2012>
- 792 Sandberg, A., Tegnér, J., & Lansner, A. (2003). A working memory model based on fast  
793 Hebbian learning. *Network: Computation in Neural Systems*, 14(4), 789–802.  
794 <https://doi.org/10.1088/0954-898X/14/4/309>
- 795 Sederberg, P. B., Kahana, M. J., Howard, M. W., Donner, E. J., & Madsen, J. R. (2003). Theta  
796 and Gamma Oscillations during Encoding Predict Subsequent Recall. *Journal of*  
797 *Neuroscience*, 23(34), 10809–10814. [https://doi.org/10.1523/JNEUROSCI.23-34-](https://doi.org/10.1523/JNEUROSCI.23-34-10809.2003)  
798 [10809.2003](https://doi.org/10.1523/JNEUROSCI.23-34-10809.2003)
- 799 Spool, J. A., Macedo-Lima, M., Scarpa, G., Morohashi, Y., Yazaki-Sugiyama, Y., & Remage-  
800 Healey, L. (2021). Genetically identified neurons in avian auditory pallium mirror core  
801 principles of their mammalian counterparts. *Current Biology*, 31(13), 2831-2843.e6.  
802 <https://doi.org/10.1016/j.cub.2021.04.039>
- 803 Sreenivasan, K. K., & D’Esposito, M. (2019). The what, where and how of delay activity. *Nature*  
804 *Reviews Neuroscience*, 20(8), 466–481. <https://doi.org/10.1038/s41583-019-0176-7>
- 805 Sridharan, D., Boahen, K., & Knudsen, E. I. (2011). Space coding by gamma oscillations in the  
806 barn owl optic tectum. *Journal of Neurophysiology*, 105(5), 2005–2017.  
807 <https://doi.org/10.1152/jn.00965.2010>

- 808 Sridharan, D., & Knudsen, E. I. (2015). Gamma oscillations in the midbrain spatial attention  
809 network: Linking circuits to function. *Current Opinion in Neurobiology*, *31*, 189–198.  
810 <https://doi.org/10.1016/j.conb.2014.11.006>
- 811 Stacho, M., Herold, C., Rook, N., Wagner, H., Axer, M., Amunts, K., & Güntürkün, O. (2020). A  
812 cortex-like canonical circuit in the avian forebrain. *Science*, *369*(6511), Article 6511.  
813 <https://doi.org/10.1126/science.abc5534>
- 814 Tallon-Baudry, C., Bertrand, O., Peronnet, F., & Pernier, J. (1998). Induced  $\gamma$ -Band Activity  
815 during the Delay of a Visual Short-Term Memory Task in Humans. *Journal of*  
816 *Neuroscience*, *18*(11), 4244–4254. [https://doi.org/10.1523/JNEUROSCI.18-11-](https://doi.org/10.1523/JNEUROSCI.18-11-04244.1998)  
817 [04244.1998](https://doi.org/10.1523/JNEUROSCI.18-11-04244.1998)
- 818 Traub, R. D., Whittington, M. A., Stanford, I. M., & Jefferys, J. G. R. (1996). A mechanism for  
819 generation of long-range synchronous fast oscillations in the cortex. *Nature*, *383*(6601),  
820 621–624. <https://doi.org/10.1038/383621a0>
- 821 Troscianko, J., von Bayern, A. M. P., Chappell, J., Rutz, C., & Martin, G. R. (2012). Extreme  
822 binocular vision and a straight bill facilitate tool use in New Caledonian crows. *Nature*  
823 *Communications*, *3*(1), 1110. <https://doi.org/10.1038/ncomms2111>
- 824 van der Meij, J., Rattenborg, N. C., & Beckers, G. J. L. (2020). Divergent neuronal activity  
825 patterns in the avian hippocampus and nidopallium. *European Journal of Neuroscience*,  
826 *52*(4), 3124–3139. <https://doi.org/10.1111/ejn.14675>
- 827 Veit, L., & Nieder, A. (2013). Abstract rule neurons in the endbrain support intelligent behaviour  
828 in corvid songbirds. *Nature Communications*, *4*, 11. <https://doi.org/10.1038/ncomms3878>
- 829 Waldmann, C., & Güntürkün, O. (1993). The dopaminergic innervation of the pigeon  
830 caudolateral forebrain—Immunocytochemical evidence for a prefrontal cortex in birds.  
831 *Brain Research*, *600*(2), 225–234. [https://doi.org/10.1016/0006-8993\(93\)91377-5](https://doi.org/10.1016/0006-8993(93)91377-5)
- 832 Wang, X.-J. (2021). 50 years of mnemonic persistent activity: Quo vadis? *Trends in*  
833 *Neurosciences*, *44*(11), 888–902. <https://doi.org/10.1016/j.tins.2021.09.001>

## 834 **Acknowledgments**

835 We would like to thank Robert Schmidt for helpful comments on an earlier draft of the manuscript.

## 836 **Author contributions**

837 Lukas Alexander Hahn, Data curation, Formal analysis, Investigation, Methodology, Software,  
838 Visualization, Writing - original draft, Writing - review and editing; Dmitry Balakhonov,  
839 Conceptualization, Data collection, Methodology; Mikael Lundqvist, Investigation, Visualization,  
840 Writing – review and editing; Andreas Nieder, Project administration, Resources, Writing - review  
841 and editing; Jonas Rose, Conceptualization, Funding acquisition, Methodology, Project  
842 administration, Resources, Supervision, Visualization, Writing - review and editing

## 843 **Declaration of interests**

844 The authors declare no competing interests.

## 845 **Funding**

846 This research was supported by a Volkswagen Foundation Freigeist Fellowship (93299) awarded  
847 to J.R. and by Deutsche Forschungsgemeinschaft Project B13 of the collaborative research  
848 center 874 (122679504). The funders had no role in study design, data collection, interpretation,  
849 or the decision to submit the work for publication.

|                     | average position information contralateral ( $R_{adj.}^2$ )  |          |         |          |         |         |
|---------------------|--------------------------------------------------------------|----------|---------|----------|---------|---------|
| frequency           | preSmp                                                       | earlySmp | lateSmp | earlyDly | midDly  | lateDly |
| $\theta(3 - 7Hz)$   | 0.0001                                                       | 0.0045   | 0.0096  | 0.0059   | 0.008   | 0.0046  |
| $\alpha(8 - 12Hz)$  | 0                                                            | 0.0067   | 0.0088  | 0.0048   | 0.007   | 0.0037  |
| $\beta(13 - 19Hz)$  | 0.0008                                                       | 0.0049   | 0.0065  | 0.0025   | 0.0121  | 0.0042  |
| $\gamma(33 - 48Hz)$ | 0.0004                                                       | 0.0182   | 0.033   | 0.0073   | 0.0064  | 0.0017  |
| $\Gamma(83 - 98Hz)$ | -0.0003                                                      | 0.0127   | 0.0152  | 0.0049   | 0.0028  | 0.0053  |
|                     | standard error of the mean (contralateral)                   |          |         |          |         |         |
| $\theta(3 - 7Hz)$   | 0.0003                                                       | 0.0006   | 0.001   | 0.0009   | 0.0009  | 0.0006  |
| $\alpha(8 - 12Hz)$  | 0.0003                                                       | 0.0009   | 0.0011  | 0.0007   | 0.0008  | 0.0005  |
| $\beta(13 - 19Hz)$  | 0.0004                                                       | 0.0007   | 0.0008  | 0.0005   | 0.0011  | 0.0005  |
| $\gamma(33 - 48Hz)$ | 0.0003                                                       | 0.0019   | 0.002   | 0.0007   | 0.0007  | 0.0005  |
| $\Gamma(83 - 98Hz)$ | 0.0003                                                       | 0.0021   | 0.0012  | 0.0007   | 0.0006  | 0.0007  |
|                     | effect size of test against null distribution ( $\omega^2$ ) |          |         |          |         |         |
| $\theta(3 - 7Hz)$   | -0.0006                                                      | 0.1584   | 0.2323  | 0.1274   | 0.21    | 0.1384  |
| $\alpha(8 - 12Hz)$  | -0.0006                                                      | 0.142    | 0.1811  | 0.1409   | 0.1899  | 0.1307  |
| $\beta(13 - 19Hz)$  | 0.0138                                                       | 0.1374   | 0.1928  | 0.0691   | 0.2993  | 0.1716  |
| $\gamma(33 - 48Hz)$ | 0.0044                                                       | 0.2327   | 0.4597  | 0.2584   | 0.2159  | 0.0419  |
| $\Gamma(83 - 98Hz)$ | 0.0014                                                       | 0.1092   | 0.3477  | 0.1384   | 0.063   | 0.1576  |
|                     | average position information ipsilateral ( $R_{adj.}^2$ )    |          |         |          |         |         |
| $\theta(3 - 7Hz)$   | -0.0013                                                      | 0.0013   | 0.0017  | 0.0058   | 0.0034  | 0.0018  |
| $\alpha(8 - 12Hz)$  | 0.0006                                                       | 0.003    | 0.0013  | 0.0016   | 0.0005  | 0.0004  |
| $\beta(13 - 19Hz)$  | 0.0005                                                       | 0.0017   | 0.0021  | 0.0004   | -0.0001 | 0.0004  |
| $\gamma(33 - 48Hz)$ | 0.0001                                                       | 0.0006   | 0.0029  | 0.0025   | 0.0008  | 0.0007  |
| $\Gamma(83 - 98Hz)$ | -0.0001                                                      | 0.0016   | 0.0009  | 0.0014   | 0.0007  | 0.0015  |
|                     | standard error of the mean (ipsilateral)                     |          |         |          |         |         |
| $\theta(3 - 7Hz)$   | 0.0003                                                       | 0.0005   | 0.0005  | 0.0007   | 0.0007  | 0.0004  |
| $\alpha(8 - 12Hz)$  | 0.0004                                                       | 0.0005   | 0.0004  | 0.0005   | 0.0004  | 0.0004  |
| $\beta(13 - 19Hz)$  | 0.0003                                                       | 0.0004   | 0.0004  | 0.0004   | 0.0003  | 0.0004  |
| $\gamma(33 - 48Hz)$ | 0.0004                                                       | 0.0004   | 0.0004  | 0.0005   | 0.0004  | 0.0003  |
| $\Gamma(83 - 98Hz)$ | 0.0003                                                       | 0.0005   | 0.0004  | 0.0005   | 0.0004  | 0.0004  |
|                     | effect size of test against null distribution ( $\omega^2$ ) |          |         |          |         |         |
| $\theta(3 - 7Hz)$   | 0.0689                                                       | 0.0218   | 0.0399  | 0.196    | 0.0736  | 0.0566  |
| $\alpha(8 - 12Hz)$  | 0.0072                                                       | 0.1012   | 0.0256  | 0.0352   | 0.0055  | 0.0042  |
| $\beta(13 - 19Hz)$  | 0.0092                                                       | 0.0531   | 0.0695  | 0.0033   | -0.0005 | 0.0033  |
| $\gamma(33 - 48Hz)$ | -0.0007                                                      | 0.0051   | 0.1166  | 0.0801   | 0.0123  | 0.0125  |
| $\Gamma(83 - 98Hz)$ | -0.0005                                                      | 0.0376   | 0.0172  | 0.025    | 0.0097  | 0.038   |

| ID                                       | F        | $df_1$ | $df_2$ | p        |
|------------------------------------------|----------|--------|--------|----------|
| $\theta(3 - 7Hz)contraPreSmp$            | 0.3103   | 1      | 1247   | 0.5776   |
| $\theta(3 - 7Hz)contraEarlySmp$          | 236.1105 | 1      | 1247   | < 0.0001 |
| $\theta(3 - 7Hz)contraLateSmp$           | 378.9953 | 1      | 1247   | < 0.0001 |
| $\theta(3 - 7Hz)contraEarlyDly$          | 183.325  | 1      | 1247   | < 0.0001 |
| $\theta(3 - 7Hz)contraMidDly$            | 332.9131 | 1      | 1247   | < 0.0001 |
| $\theta(3 - 7Hz)contraLateDlyEarlyChc$   | 201.582  | 1      | 1247   | < 0.0001 |
| $\theta(3 - 7Hz)ipsiPreSmp$              | 93.4328  | 1      | 1247   | < 0.0001 |
| $\theta(3 - 7Hz)ipsiEarlySmp$            | 28.8243  | 1      | 1247   | < 0.0001 |
| $\theta(3 - 7Hz)ipsiLateSmp$             | 52.9692  | 1      | 1247   | < 0.0001 |
| $\theta(3 - 7Hz)ipsiEarlyDly$            | 305.5275 | 1      | 1247   | < 0.0001 |
| $\theta(3 - 7Hz)ipsiMidDly$              | 100.2107 | 1      | 1247   | < 0.0001 |
| $\theta(3 - 7Hz)ipsiLateDlyEarlyChc$     | 75.9505  | 1      | 1247   | < 0.0001 |
| $\alpha(8 - 12Hz)contraPreSmp$           | 0.196    | 1      | 1247   | 0.6581   |
| $\alpha(8 - 12Hz)contraEarlySmp$         | 207.6518 | 1      | 1247   | < 0.0001 |
| $\alpha(8 - 12Hz)contraLateSmp$          | 277.1249 | 1      | 1247   | < 0.0001 |
| $\alpha(8 - 12Hz)contraEarlyDly$         | 205.7884 | 1      | 1247   | < 0.0001 |
| $\alpha(8 - 12Hz)contraMidDly$           | 293.8236 | 1      | 1247   | < 0.0001 |
| $\alpha(8 - 12Hz)contraLateDlyEarlyChc$  | 188.7494 | 1      | 1247   | < 0.0001 |
| $\alpha(8 - 12Hz)ipsiPreSmp$             | 10.015   | 1      | 1247   | 0.0016   |
| $\alpha(8 - 12Hz)ipsiEarlySmp$           | 141.6304 | 1      | 1247   | < 0.0001 |
| $\alpha(8 - 12Hz)ipsiLateSmp$            | 33.8392  | 1      | 1247   | < 0.0001 |
| $\alpha(8 - 12Hz)ipsiEarlyDly$           | 46.5335  | 1      | 1247   | < 0.0001 |
| $\alpha(8 - 12Hz)ipsiMidDly$             | 7.9221   | 1      | 1247   | 0.005    |
| $\alpha(8 - 12Hz)ipsiLateDlyEarlyChc$    | 6.2923   | 1      | 1247   | 0.0123   |
| $\beta(13 - 19Hz)contraPreSmp$           | 18.4705  | 1      | 1247   | < 0.0001 |
| $\beta(13 - 19Hz)contraEarlySmp$         | 200.0195 | 1      | 1247   | < 0.0001 |
| $\beta(13 - 19Hz)contraLateSmp$          | 299.3604 | 1      | 1247   | < 0.0001 |
| $\beta(13 - 19Hz)contraEarlyDly$         | 93.7528  | 1      | 1247   | < 0.0001 |
| $\beta(13 - 19Hz)contraMidDly$           | 534.4364 | 1      | 1247   | < 0.0001 |
| $\beta(13 - 19Hz)contraLateDlyEarlyChc$  | 259.699  | 1      | 1247   | < 0.0001 |
| $\beta(13 - 19Hz)ipsiPreSmp$             | 12.6119  | 1      | 1247   | 0.0004   |
| $\beta(13 - 19Hz)ipsiEarlySmp$           | 71.0949  | 1      | 1247   | < 0.0001 |
| $\beta(13 - 19Hz)ipsiLateSmp$            | 94.2461  | 1      | 1247   | < 0.0001 |
| $\beta(13 - 19Hz)ipsiEarlyDly$           | 5.0947   | 1      | 1247   | 0.0242   |
| $\beta(13 - 19Hz)ipsiMidDly$             | 0.4002   | 1      | 1247   | 0.5271   |
| $\beta(13 - 19Hz)ipsiLateDlyEarlyChc$    | 5.1808   | 1      | 1247   | 0.023    |
| $\gamma(33 - 48Hz)contraPreSmp$          | 6.4733   | 1      | 1247   | 0.0111   |
| $\gamma(33 - 48Hz)contraEarlySmp$        | 379.8323 | 1      | 1247   | < 0.0001 |
| $\gamma(33 - 48Hz)contraLateSmp$         | 1063.827 | 1      | 1247   | < 0.0001 |
| $\gamma(33 - 48Hz)contraEarlyDly$        | 436.2718 | 1      | 1247   | < 0.0001 |
| $\gamma(33 - 48Hz)contraMidDly$          | 344.8669 | 1      | 1247   | < 0.0001 |
| $\gamma(33 - 48Hz)contraLateDlyEarlyChc$ | 55.5925  | 1      | 1247   | < 0.0001 |
| $\gamma(33 - 48Hz)ipsiPreSmp$            | 0.1014   | 1      | 1247   | 0.7502   |
| $\gamma(33 - 48Hz)ipsiEarlySmp$          | 7.44     | 1      | 1247   | 0.0065   |
| $\gamma(33 - 48Hz)ipsiLateSmp$           | 165.8605 | 1      | 1247   | < 0.0001 |
| $\gamma(33 - 48Hz)ipsiEarlyDly$          | 109.7774 | 1      | 1247   | < 0.0001 |
| $\gamma(33 - 48Hz)ipsiMidDly$            | 16.5156  | 1      | 1247   | < 0.0001 |
| $\gamma(33 - 48Hz)ipsiLateDlyEarlyChc$   | 16.8524  | 1      | 1247   | < 0.0001 |

Table 2: continued

|                                             |          |   |      |          |
|---------------------------------------------|----------|---|------|----------|
| $\Gamma(83 - 98Hz)_{contraPreSmp}$          | 2.7801   | 1 | 1247 | 0.0957   |
| $\Gamma(83 - 98Hz)_{contraEarlySmp}$        | 154.0675 | 1 | 1247 | < 0.0001 |
| $\Gamma(83 - 98Hz)_{contraLateSmp}$         | 666.6498 | 1 | 1247 | < 0.0001 |
| $\Gamma(83 - 98Hz)_{contraEarlyDly}$        | 201.7003 | 1 | 1247 | < 0.0001 |
| $\Gamma(83 - 98Hz)_{contraMidDly}$          | 85.0001  | 1 | 1247 | < 0.0001 |
| $\Gamma(83 - 98Hz)_{contraLateDlyEarlyChc}$ | 234.6346 | 1 | 1247 | < 0.0001 |
| $\Gamma(83 - 98Hz)_{ipsiPreSmp}$            | 0.3795   | 1 | 1247 | 0.538    |
| $\Gamma(83 - 98Hz)_{ipsiEarlySmp}$          | 49.7564  | 1 | 1247 | < 0.0001 |
| $\Gamma(83 - 98Hz)_{ipsiLateSmp}$           | 22.8253  | 1 | 1247 | < 0.0001 |
| $\Gamma(83 - 98Hz)_{ipsiEarlyDly}$          | 32.9647  | 1 | 1247 | < 0.0001 |
| $\Gamma(83 - 98Hz)_{ipsiMidDly}$            | 13.1832  | 1 | 1247 | 0.0003   |
| $\Gamma(83 - 98Hz)_{ipsiLateDlyEarlyChc}$   | 50.3882  | 1 | 1247 | < 0.0001 |

| bin start relative to sample on (ms) | avg. chg. per item ( $\times 10^{-2}\%$ ) $\pm$ SEM, test vs. 0; effect size of factor load |
|--------------------------------------|---------------------------------------------------------------------------------------------|
| $\theta(3 - 7Hz)$                    |                                                                                             |
| -200                                 | -0.0002 $\pm$ 0.028, t(288) = 0.01833, p = 0.9854; $\omega^2$ = 0.0059                      |
| -100                                 | 0.0016 $\pm$ 0.0235, t(288) = -0.18974, p = 0.8496; $\omega^2$ = 0.0032                     |
| 0                                    | 0.0055 $\pm$ 0.0202, t(288) = -0.74963, p = 0.4541; $\omega^2$ = -0.0017                    |
| 100                                  | 0.008 $\pm$ 0.017, t(288) = -1.2945, p = 0.1965; $\omega^2$ = -0.0026                       |
| 200                                  | 0.0095 $\pm$ 0.014, t(288) = -1.8655, p = 0.0631; $\omega^2$ = 0.002                        |
| 300                                  | 0.0103 $\pm$ 0.0122, t(288) = -2.3301, p = 0.0205; $\omega^2$ = 0.0019                      |
| 400                                  | 0.0124 $\pm$ 0.0129, t(288) = -2.6689, p = 0.008; $\omega^2$ = -0.0262                      |
| 500                                  | 0.0198 $\pm$ 0.0155, t(288) = -3.5227, p = 0.0005; $\omega^2$ = -0.0374                     |
| 600                                  | 0.0318 $\pm$ 0.0174, t(288) = -5.039, p < 0.0001; $\omega^2$ = -0.0126                      |
| 700                                  | 0.0429 $\pm$ 0.0169, t(288) = -6.9947, p < 0.0001; $\omega^2$ = 0.0209                      |
| 800                                  | 0.0486 $\pm$ 0.015, t(288) = -8.9559, p < 0.0001; $\omega^2$ = 0.0412                       |
| 900                                  | 0.0492 $\pm$ 0.0131, t(288) = -10.3168, p < 0.0001; $\omega^2$ = 0.045                      |
| 1000                                 | 0.0487 $\pm$ 0.0122, t(288) = -11.0283, p < 0.0001; $\omega^2$ = 0.0465                     |
| 1100                                 | 0.0517 $\pm$ 0.0122, t(288) = -11.7262, p < 0.0001; $\omega^2$ = 0.0584                     |
| 1200                                 | 0.0592 $\pm$ 0.0129, t(288) = -12.6267, p < 0.0001; $\omega^2$ = 0.0865                     |
| 1300                                 | 0.0718 $\pm$ 0.0144, t(288) = -13.7098, p < 0.0001; $\omega^2$ = 0.1366                     |
| 1400                                 | 0.0918 $\pm$ 0.0168, t(288) = -15.0213, p < 0.0001; $\omega^2$ = 0.2025                     |
| 1500                                 | 0.1182 $\pm$ 0.0197, t(288) = -16.537, p < 0.0001; $\omega^2$ = 0.2471                      |
| 1600                                 | 0.1423 $\pm$ 0.0226, t(288) = -17.3278, p < 0.0001; $\omega^2$ = 0.2502                     |
| 1700                                 | 0.1503 $\pm$ 0.0248, t(288) = -16.7352, p < 0.0001; $\omega^2$ = 0.2248                     |
| 1800                                 | 0.1339 $\pm$ 0.0245, t(288) = -15.0652, p < 0.0001; $\omega^2$ = 0.1833                     |
| 1900                                 | 0.1003 $\pm$ 0.0242, t(288) = -11.4106, p < 0.0001; $\omega^2$ = 0.1308                     |
| 2000                                 | 0.0714 $\pm$ 0.0297, t(288) = -6.6298, p < 0.0001; $\omega^2$ = 0.0859                      |
| 2100                                 | 0.0537 $\pm$ 0.0334, t(287) = -4.4192, p < 0.0001; $\omega^2$ = 0.0529                      |
| $\alpha(8 - 12Hz)$                   |                                                                                             |
| -200                                 | -0.0004 $\pm$ 0.0257, t(268) = 0.038799, p = 0.9691; $\omega^2$ = 0.006                     |
| -100                                 | 0.01 $\pm$ 0.0215, t(268) = -1.2311, p = 0.2194; $\omega^2$ = 0.0003                        |
| 0                                    | 0.0217 $\pm$ 0.0187, t(269) = -3.0882, p = 0.0022; $\omega^2$ = 0.0034                      |
| 100                                  | 0.0276 $\pm$ 0.015, t(269) = -4.9084, p < 0.0001; $\omega^2$ = 0.0289                       |
| 200                                  | 0.0352 $\pm$ 0.0133, t(269) = -7.0544, p < 0.0001; $\omega^2$ = 0.0197                      |
| 300                                  | 0.0227 $\pm$ 0.0147, t(269) = -4.1294, p < 0.0001; $\omega^2$ = 0.0056                      |
| 400                                  | 0.0112 $\pm$ 0.0209, t(269) = -1.4248, p = 0.1554; $\omega^2$ = -0.0133                     |
| 500                                  | 0.0154 $\pm$ 0.0264, t(269) = -1.5565, p = 0.1208; $\omega^2$ = -0.0437                     |
| 600                                  | 0.034 $\pm$ 0.0305, t(269) = -2.9688, p = 0.0033; $\omega^2$ = -0.0223                      |
| 700                                  | 0.0521 $\pm$ 0.0292, t(269) = -4.7633, p < 0.0001; $\omega^2$ = 0.0062                      |
| 800                                  | 0.065 $\pm$ 0.021, t(269) = -8.2519, p < 0.0001; $\omega^2$ = 0.0199                        |
| 900                                  | 0.0681 $\pm$ 0.016, t(269) = -11.324, p < 0.0001; $\omega^2$ = 0.048                        |
| 1000                                 | 0.0461 $\pm$ 0.014, t(269) = -8.7594, p < 0.0001; $\omega^2$ = 0.0126                       |
| 1100                                 | 0.0384 $\pm$ 0.0147, t(269) = -6.98, p < 0.0001; $\omega^2$ = 0.0016                        |
| 1200                                 | 0.0448 $\pm$ 0.0146, t(269) = -8.1937, p < 0.0001; $\omega^2$ = -0.002                      |
| 1300                                 | 0.0631 $\pm$ 0.0154, t(269) = -10.8933, p < 0.0001; $\omega^2$ = -0.0074                    |
| 1400                                 | 0.1071 $\pm$ 0.0184, t(269) = -15.5377, p < 0.0001; $\omega^2$ = 0.066                      |
| 1500                                 | 0.1502 $\pm$ 0.0205, t(269) = -19.5323, p < 0.0001; $\omega^2$ = 0.1728                     |
| 1600                                 | 0.1909 $\pm$ 0.0257, t(269) = -19.8154, p < 0.0001; $\omega^2$ = 0.1969                     |
| 1700                                 | 0.2037 $\pm$ 0.0268, t(269) = -20.2351, p < 0.0001; $\omega^2$ = 0.2055                     |
| 1800                                 | 0.1787 $\pm$ 0.0246, t(269) = -19.3425, p < 0.0001; $\omega^2$ = 0.1967                     |
| 1900                                 | 0.143 $\pm$ 0.0213, t(269) = -17.8667, p < 0.0001; $\omega^2$ = 0.1                         |
| 2000                                 | 0.1168 $\pm$ 0.0221, t(269) = -14.0688, p < 0.0001; $\omega^2$ = 0.0719                     |
| 2100                                 | 0.0953 $\pm$ 0.0201, t(269) = -12.643, p < 0.0001; $\omega^2$ = 0.0656                      |

| Table 3: continued  |                                                                                 |
|---------------------|---------------------------------------------------------------------------------|
| $\beta(13 - 19Hz)$  |                                                                                 |
| -200                | $0.0067 \pm 0.0391$ , $t(191) = -0.38236$ , $p = 0.7026$ ; $\omega^2 = 0.0131$  |
| -100                | $-0.0061 \pm 0.0221$ , $t(192) = 0.62171$ , $p = 0.5349$ ; $\omega^2 = 0.0147$  |
| 0                   | $0.0122 \pm 0.0201$ , $t(192) = -1.3742$ , $p = 0.171$ ; $\omega^2 = -0.0003$   |
| 100                 | $0.0323 \pm 0.0132$ , $t(192) = -5.5143$ , $p < 0.0001$ ; $\omega^2 = 0.011$    |
| 200                 | $0.0125 \pm 0.0114$ , $t(192) = -2.4815$ , $p = 0.0139$ ; $\omega^2 = 0.0265$   |
| 300                 | $-0.0354 \pm 0.0132$ , $t(192) = 6.0399$ , $p < 0.0001$ ; $\omega^2 = 0.058$    |
| 400                 | $-0.0225 \pm 0.0161$ , $t(192) = 3.1334$ , $p = 0.002$ ; $\omega^2 = 0.0217$    |
| 500                 | $-0.0262 \pm 0.018$ , $t(192) = 3.2814$ , $p = 0.0012$ ; $\omega^2 = 0.0202$    |
| 600                 | $-0.0175 \pm 0.0177$ , $t(192) = 2.2277$ , $p = 0.0271$ ; $\omega^2 = 0.0164$   |
| 700                 | $-0.0089 \pm 0.0167$ , $t(192) = 1.2002$ , $p = 0.2315$ ; $\omega^2 = 0.0154$   |
| 800                 | $0.0059 \pm 0.0145$ , $t(192) = -0.91096$ , $p = 0.3635$ ; $\omega^2 = 0.0232$  |
| 900                 | $0.0236 \pm 0.0133$ , $t(192) = -4.0074$ , $p < 0.0001$ ; $\omega^2 = 0.0184$   |
| 1000                | $0.0002 \pm 0.0117$ , $t(192) = -0.033248$ , $p = 0.9735$ ; $\omega^2 = 0.0044$ |
| 1100                | $0.0061 \pm 0.0123$ , $t(192) = -1.1262$ , $p = 0.2615$ ; $\omega^2 = 0.0042$   |
| 1200                | $0.0212 \pm 0.0113$ , $t(192) = -4.2481$ , $p < 0.0001$ ; $\omega^2 = 0.0007$   |
| 1300                | $0.0403 \pm 0.0118$ , $t(192) = -7.7319$ , $p < 0.0001$ ; $\omega^2 = 0.0044$   |
| 1400                | $0.0721 \pm 0.0154$ , $t(192) = -10.5736$ , $p < 0.0001$ ; $\omega^2 = 0.0368$  |
| 1500                | $0.0977 \pm 0.0156$ , $t(192) = -14.1347$ , $p < 0.0001$ ; $\omega^2 = 0.0725$  |
| 1600                | $0.1319 \pm 0.0162$ , $t(192) = -18.3303$ , $p < 0.0001$ ; $\omega^2 = 0.118$   |
| 1700                | $0.1321 \pm 0.0181$ , $t(192) = -16.4302$ , $p < 0.0001$ ; $\omega^2 = 0.0797$  |
| 1800                | $0.1126 \pm 0.0154$ , $t(192) = -16.4416$ , $p < 0.0001$ ; $\omega^2 = 0.0787$  |
| 1900                | $0.0988 \pm 0.0143$ , $t(192) = -15.5418$ , $p < 0.0001$ ; $\omega^2 = 0.0513$  |
| 2000                | $0.1023 \pm 0.0147$ , $t(192) = -15.7297$ , $p < 0.0001$ ; $\omega^2 = 0.085$   |
| 2100                | $0.0714 \pm 0.0176$ , $t(192) = -9.1154$ , $p < 0.0001$ ; $\omega^2 = 0.0485$   |
| $\gamma(33 - 48Hz)$ |                                                                                 |
| -200                | $0.0284 \pm 0.0424$ , $t(248) = -1.7162$ , $p = 0.0874$ ; $\omega^2 = 0.0084$   |
| -100                | $-0.0237 \pm 0.0183$ , $t(248) = 3.3185$ , $p = 0.001$ ; $\omega^2 = 0.016$     |
| 0                   | $-0.0176 \pm 0.0374$ , $t(248) = 1.2047$ , $p = 0.2295$ ; $\omega^2 = 0.0062$   |
| 100                 | $0.0117 \pm 0.0086$ , $t(248) = -3.4988$ , $p = 0.0006$ ; $\omega^2 = 0.0313$   |
| 200                 | $-0.0451 \pm 0.0082$ , $t(248) = 14.0087$ , $p < 0.0001$ ; $\omega^2 = 0.0592$  |
| 300                 | $-0.0514 \pm 0.0107$ , $t(248) = 12.297$ , $p < 0.0001$ ; $\omega^2 = 0.0485$   |
| 400                 | $-0.0414 \pm 0.0138$ , $t(248) = 7.6807$ , $p < 0.0001$ ; $\omega^2 = 0.0244$   |
| 500                 | $-0.0527 \pm 0.0139$ , $t(248) = 9.7$ , $p < 0.0001$ ; $\omega^2 = 0.0453$      |
| 600                 | $-0.0471 \pm 0.0095$ , $t(248) = 12.7011$ , $p < 0.0001$ ; $\omega^2 = 0.0838$  |
| 700                 | $-0.0497 \pm 0.0083$ , $t(248) = 15.2964$ , $p < 0.0001$ ; $\omega^2 = 0.0716$  |
| 800                 | $-0.0306 \pm 0.0076$ , $t(248) = 10.2899$ , $p < 0.0001$ ; $\omega^2 = 0.0584$  |
| 900                 | $-0.0015 \pm 0.0076$ , $t(248) = 0.51818$ , $p = 0.6048$ ; $\omega^2 = 0.0098$  |
| 1000                | $-0.0053 \pm 0.0084$ , $t(248) = 1.6083$ , $p = 0.109$ ; $\omega^2 = 0.0387$    |
| 1100                | $-0.0153 \pm 0.0086$ , $t(248) = 4.578$ , $p < 0.0001$ ; $\omega^2 = 0.0262$    |
| 1200                | $-0.0184 \pm 0.0074$ , $t(248) = 6.3718$ , $p < 0.0001$ ; $\omega^2 = 0.0044$   |
| 1300                | $-0.0282 \pm 0.0092$ , $t(248) = 7.8115$ , $p < 0.0001$ ; $\omega^2 = 0.0172$   |
| 1400                | $-0.0379 \pm 0.0102$ , $t(248) = 9.54$ , $p < 0.0001$ ; $\omega^2 = -0.0012$    |
| 1500                | $-0.027 \pm 0.01$ , $t(248) = 6.9461$ , $p < 0.0001$ ; $\omega^2 = 0.0096$      |
| 1600                | $-0.0199 \pm 0.0099$ , $t(248) = 5.1705$ , $p < 0.0001$ ; $\omega^2 = 0.0152$   |
| 1700                | $0.0107 \pm 0.0101$ , $t(248) = -2.6985$ , $p = 0.0074$ ; $\omega^2 = 0.0446$   |
| 1800                | $0.0187 \pm 0.0107$ , $t(248) = -4.452$ , $p < 0.0001$ ; $\omega^2 = 0.0499$    |
| 1900                | $0.0722 \pm 0.0101$ , $t(248) = -18.2718$ , $p < 0.0001$ ; $\omega^2 = 0.0711$  |
| 2000                | $0.089 \pm 0.0108$ , $t(248) = -21.1006$ , $p < 0.0001$ ; $\omega^2 = 0.0799$   |
| 2100                | $0.0786 \pm 0.0106$ , $t(248) = -18.974$ , $p < 0.0001$ ; $\omega^2 = 0.0525$   |



| Table 3: continued  | available under aCC-BY 4.0 International license.                               |
|---------------------|---------------------------------------------------------------------------------|
| $\Gamma(83 - 98Hz)$ |                                                                                 |
| -200                | $0.0176 \pm 0.0364$ , $t(229) = -1.1913$ , $p = 0.2348$ ; $\omega^2 = 0.0056$   |
| -100                | $-0.0091 \pm 0.0275$ , $t(233) = 0.82159$ , $p = 0.4121$ ; $\omega^2 = 0.0148$  |
| 0                   | $-0.0183 \pm 0.0211$ , $t(230) = 2.1443$ , $p = 0.0331$ ; $\omega^2 = 0.0103$   |
| 100                 | $-0.0491 \pm 0.0057$ , $t(233) = 21.2992$ , $p < 0.0001$ ; $\omega^2 = 0.0797$  |
| 200                 | $-0.0532 \pm 0.0067$ , $t(233) = 19.596$ , $p < 0.0001$ ; $\omega^2 = 0.0842$   |
| 300                 | $-0.002 \pm 0.0071$ , $t(233) = 0.68699$ , $p = 0.4928$ ; $\omega^2 = 0.0389$   |
| 400                 | $-0.0159 \pm 0.0073$ , $t(233) = 5.3819$ , $p < 0.0001$ ; $\omega^2 = 0.029$    |
| 500                 | $-0.0288 \pm 0.008$ , $t(233) = 8.8849$ , $p < 0.0001$ ; $\omega^2 = 0.0434$    |
| 600                 | $-0.0059 \pm 0.0096$ , $t(233) = 1.536$ , $p = 0.1259$ ; $\omega^2 = 0.0284$    |
| 700                 | $-0.0118 \pm 0.0076$ , $t(233) = 3.8498$ , $p = 0.0002$ ; $\omega^2 = 0.0319$   |
| 800                 | $-0.0049 \pm 0.0083$ , $t(233) = 1.4611$ , $p = 0.1453$ ; $\omega^2 = 0.0272$   |
| 900                 | $-0.0127 \pm 0.0066$ , $t(233) = 4.8156$ , $p < 0.0001$ ; $\omega^2 = 0.0282$   |
| 1000                | $0.0011 \pm 0.0088$ , $t(233) = -0.30018$ , $p = 0.7643$ ; $\omega^2 = 0.0133$  |
| 1100                | $0.0005 \pm 0.0081$ , $t(233) = -0.14972$ , $p = 0.8811$ ; $\omega^2 = 0.0093$  |
| 1200                | $-0.0111 \pm 0.0063$ , $t(233) = 4.3941$ , $p < 0.0001$ ; $\omega^2 = 0.0099$   |
| 1300                | $-0.0048 \pm 0.0057$ , $t(233) = 2.0878$ , $p = 0.0379$ ; $\omega^2 = 0.0051$   |
| 1400                | $-0.0146 \pm 0.007$ , $t(233) = 5.1816$ , $p < 0.0001$ ; $\omega^2 = 0.0011$    |
| 1500                | $-0.0259 \pm 0.0071$ , $t(233) = 9.0215$ , $p < 0.0001$ ; $\omega^2 = -0.0062$  |
| 1600                | $-0.0367 \pm 0.0077$ , $t(233) = 11.8365$ , $p < 0.0001$ ; $\omega^2 = -0.0103$ |
| 1700                | $-0.0302 \pm 0.007$ , $t(233) = 10.7248$ , $p < 0.0001$ ; $\omega^2 = -0.0225$  |
| 1800                | $-0.0325 \pm 0.0068$ , $t(233) = 11.9615$ , $p < 0.0001$ ; $\omega^2 = 0.0216$  |
| 1900                | $-0.0206 \pm 0.006$ , $t(233) = 8.4922$ , $p < 0.0001$ ; $\omega^2 = 0.0336$    |
| 2000                | $-0.0418 \pm 0.0097$ , $t(233) = 10.6327$ , $p < 0.0001$ ; $\omega^2 = 0.0104$  |
| 2100                | $0.002 \pm 0.0072$ , $t(233) = -0.69613$ , $p = 0.487$ ; $\omega^2 = 0.0109$    |

| frequency band      | maximum mean burst rate    |                             |                             |                             |
|---------------------|----------------------------|-----------------------------|-----------------------------|-----------------------------|
|                     | load 0                     | load 1                      | load 2                      | load 3                      |
| $\alpha(8 - 12Hz)$  | 0.0287±0.0009<br>at 677 ms | 0.0236±0.0004<br>at 1272 ms | 0.0208±0.0003<br>at 1278 ms | 0.0241±0.0004<br>at 1264 ms |
| $\beta(13 - 19Hz)$  | 0.0675±0.0011<br>at 571 ms | 0.0787±0.0007<br>at 1255 ms | 0.0732±0.0018<br>at 1249 ms | 0.0755±0.0007<br>at 1259 ms |
| $\gamma(33 - 48Hz)$ | 0.0687±0.0007<br>at 52 ms  | 0.0834±0.0008<br>at 620 ms  | 0.0759±0.0019<br>at 577 ms  | 0.0757±0.0017<br>at 641 ms  |
| $\Gamma(83 - 98Hz)$ | 0.0903±0.0028<br>at 349 ms | 0.086±0.0012 at<br>251 ms   | 0.0796±0.002 at<br>533 ms   | 0.0768±0.0013<br>at 478 ms  |

**Table 5:** Statistics of burst rates under a  $CO_2$  by 11% increase. Each row reports the relevant values of the significant phases indicated in Fig. 4A and SFig. 4., ordered chronologically.

|                                                              |                                                                                                                            |
|--------------------------------------------------------------|----------------------------------------------------------------------------------------------------------------------------|
| $\alpha(8 - 12Hz)$                                           | $\gamma(33 - 48Hz)$                                                                                                        |
| $F_{(2,2)} \geq 3.039, p \leq 0.0485, \omega^2 \geq 0.0054$  | $F_{(2,2)} \geq 3.0986, p \leq 0.0457, \omega^2 \geq 0.0056$<br>$F_{(2,2)} \geq 3.207, p \leq 0.041, \omega^2 \geq 0.0059$ |
| $\beta(13 - 19Hz)$                                           | $\Gamma(83 - 98Hz)$                                                                                                        |
| $F_{(2,2)} \geq 3.0707, p \leq 0.047, \omega^2 \geq 0.0055$  | $F_{(2,2)} \geq 3.0345, p \leq 0.0487, \omega^2 \geq 0.0054$                                                               |
| $F_{(2,2)} \geq 3.4829, p \leq 0.0312, \omega^2 \geq 0.0066$ | $F_{(2,2)} \geq 3.6008, p \leq 0.0278, \omega^2 \geq 0.0069$                                                               |
| $F_{(2,2)} \geq 3.0093, p \leq 0.0499, \omega^2 \geq 0.0054$ | $F_{(2,2)} \geq 3.0612, p \leq 0.0474, \omega^2 \geq 0.0055$                                                               |
| $F_{(2,2)} \geq 3.2254, p \leq 0.0403, \omega^2 \geq 0.0059$ | $F_{(2,2)} \geq 3.0263, p \leq 0.0491, \omega^2 \geq 0.0054$                                                               |
| $F_{(2,2)} \geq 3.1102, p \leq 0.0452, \omega^2 \geq 0.0056$ | $F_{(2,2)} \geq 3.1971, p \leq 0.0414, \omega^2 \geq 0.0058$                                                               |
| $F_{(2,2)} \geq 3.1779, p \leq 0.0422, \omega^2 \geq 0.0058$ | $F_{(2,2)} \geq 3.2945, p \leq 0.0376, \omega^2 \geq 0.0061$                                                               |
| $F_{(2,2)} \geq 3.076, p \leq 0.0467, \omega^2 \geq 0.0055$  | $F_{(2,2)} \geq 3.3135, p \leq 0.0369, \omega^2 \geq 0.0062$                                                               |
|                                                              | $F_{(2,2)} \geq 3.6533, p \leq 0.0264, \omega^2 \geq 0.0071$                                                               |
|                                                              | $F_{(2,2)} \geq 3.6822, p \leq 0.0256, \omega^2 \geq 0.0071$                                                               |
|                                                              | $F_{(2,2)} \geq 3.8703, p \leq 0.0213, \omega^2 \geq 0.0076$                                                               |
|                                                              | $F_{(2,2)} \geq 3.0757, p \leq 0.0467, \omega^2 \geq 0.0055$                                                               |
|                                                              | $F_{(2,2)} \geq 3.0663, p \leq 0.0472, \omega^2 \geq 0.0055$                                                               |
|                                                              | $F_{(2,2)} \geq 3.9306, p \leq 0.02, \omega^2 \geq 0.0078$                                                                 |
|                                                              | $F_{(2,2)} \geq 3.4978, p \leq 0.0308, \omega^2 \geq 0.0066$                                                               |
